# Supplementary material for: Volatilome Analysis of Soursop Fruits for the Determination of Kairomone Components That Attract the Annonaceae Fruit Weevil (Optatus palmaris Pascoe)
Source: MDPI journal article supplement (doi:10.3390/plants12223898), 2023-11-18
Supplement: s1 [file s1]

**Table S1.** Tentatively identified and well identified volatiles in the aromas of flowers and fruits of soursop (*Annona muricata* L.) in different maturation stages determined by gas chromatography coupled with mass spectrometry.

|             |           |        | Retention index | RI <sup>813</sup>              | RI <sup>880</sup> | RI <sup>931</sup> | RI <sup>955</sup> | RI <sup>1008</sup> | RI <sup>1026</sup>       | RI <sup>1033</sup> | RI <sup>1037</sup> | RI <sup>1045</sup>   |
|-------------|-----------|--------|-----------------|--------------------------------|-------------------|-------------------|-------------------|--------------------|--------------------------|--------------------|--------------------|----------------------|
| Sample code | Phenology | Organ  | Maturity        | 2-methyl tetrahydrofuran-3-one | allyl butanoate   | $\alpha$ -pinene  | camphene          | $\delta$ -3-carene | 2-methyl-6-vinylpirazine | limonene           | 1,8-cineole        | benzene acetaldehyde |
| EFR1        | G0        | Flower | 1               | 0.163044                       | 0.155002          | 108,035           | 0.166927          | 1.00E-09           | 216,917                  | 1.00E-09           | 1.00E-09           | 0.00600578           |
| EFR2        | G0        | Flower | 1               | 0.0781613                      | 1.00E-09          | 0.643864          | 1.00E-09          | 0.0689905          | 457,134                  | 1.00E-09           | 1.00E-09           | 0.333                |
| EFR3        | G0        | Flower | 1               | 1.00E-09                       | 0.103668          | 0.395099          | 880,793           | 1.00E-09           | 132,873                  | 1.00E-09           | 0.0364091          | 0.708502             |
| EFR4        | G0        | Flower | 1               | 1.00E-09                       | 0.0104368         | 0.391244          | 0.107335          | 1.00E-09           | 132,873                  | 1.00E-09           | 1.00E-09           | 0.325239             |
| EFR5        | G0        | Flower | 1               | 0.629758                       | 1.00E-09          | 114,585           | 0.289527          | 0.151144           | 132,873                  | 1.00E-09           | 1.00E-09           | 1.00E-09             |
| EFR6        | G0        | Flower | 1               | 0.103187                       | 0.179144          | 151,163           | 0.454892          | 0.20953            | 132,873                  | 1.00E-09           | 0.272604           | 0.965188             |
| EFR7        | G0        | Flower | 1               | 0.310406                       | 0.175512          | 122,646           | 0.16047           | 1.00E-09           | 204,997                  | 1.00E-09           | 0.144833           | 0.992806             |
| EFR8        | G0        | Flower | 1               | 0.218938                       | 1.00E-09          | 0.350572          | 246,621           | 1.00E-09           | 478,961                  | 1.00E-09           | 0.0443204          | 0.665899             |
| EFR9        | G0        | Flower | 1               | 0.0629739                      | 1.00E-09          | 0.281076          | 1.00E-09          | 1.00E-09           | 140,771                  | 1.00E-09           | 0.345091           | 110,613              |
| EFR10       | G0        | Flower | 1               | 1.00E-09                       | 1.00E-09          | 0.312151          | 1.00E-09          | 1.00E-09           | 732,916                  | 544,648            | 1.00E-09           | 565,141              |
| FCPR1       | G1        | Fruit  | 2               | 1.00E-09                       | 1.00E-09          | 0.0179113         | 0.0412708         | 1.00E-09           | 1.00E-09                 | 1.00E-09           | 1.00E-09           | 1.00E-09             |
| FCPR2       | G1        | Fruit  | 2               | 0.348689                       | 0.799334          | 585,378           | 1.00E-09          | 110,424            | 0.517859                 | 0.416596           | 1.00E-09           | 0.546641             |
| FCPR3       | G1        | Fruit  | 2               | 0.15831                        | 0.0292102         | 0.928724          | 0.192258          | 1.00E-09           | 0.529518                 | 0.0530955          | 1.00E-09           | 0.663771             |
| FCPR4       | G1        | Fruit  | 2               | 0.628746                       | 102,047           | 859,463           | 1.00E-09          | 113,718            | 0.982561                 | 1.00E-09           | 1.00E-09           | 0.599748             |
| FCHR1       | G2        | Fruit  | 3               | 1.00E-09                       | 0.335796          | 207,886           | 0.609441          | 0.27006            | 0.575474                 | 0.0538183          | 0.13128            | 0.723401             |

|              |           |              |          |           |          |          |          |           |          |          |           |          |
|--------------|-----------|--------------|----------|-----------|----------|----------|----------|-----------|----------|----------|-----------|----------|
| <b>FCHR2</b> | <b>G2</b> | <b>Fruit</b> | <b>3</b> | 0.515127  | 0.522284 | 34,081   | 0.899409 | 0.447398  | 0.718105 | 0.173694 | 0.173726  | 0.73928  |
| <b>FCHR3</b> | <b>G2</b> | <b>Fruit</b> | <b>3</b> | 0.270065  | 108,273  | 117,888  | 1.00E-09 | 147,932   | 0.420039 | 303,993  | 1.00E-09  | 0.493392 |
| <b>FCHR4</b> | <b>G2</b> | <b>Fruit</b> | <b>3</b> | 0.171913  | 0.258762 | 298,086  | 1.00E-09 | 0.3095    | 0.323552 | 1.00E-09 | 1.00E-09  | 0.151079 |
| <b>FMR1</b>  | <b>G3</b> | <b>Fruit</b> | <b>4</b> | 0.0874159 | 0.197456 | 213,801  | 1.00E-09 | 0.098784  | 0.768444 | 1.00E-09 | 0.189966  | 0.289337 |
| <b>FMR2</b>  | <b>G3</b> | <b>Fruit</b> | <b>4</b> | 259,617   | 247,592  | 154,035  | 0.820368 | 255,366   | 361,839  | 438,029  | 0.26804   | 110,787  |
| <b>FMR3</b>  | <b>G3</b> | <b>Fruit</b> | <b>4</b> | 0.0549369 | 0.394817 | 134,913  | 0.154756 | 0.16333   | 0.480371 | 1.00E-09 | 1.00E-09  | 0.187532 |
| <b>FMR4</b>  | <b>G3</b> | <b>Fruit</b> | <b>4</b> | 0.321298  | 112,933  | 139,953  | 1.00E-09 | 198,636   | 0.809386 | 173,089  | 148,674   | 1.00E-09 |
| <b>FGR1</b>  | <b>G4</b> | <b>Fruit</b> | <b>5</b> | 0.316971  | 0.184052 | 203,738  | 710,616  | 1.00E-09  | 191,776  | 0.760126 | 0.078835  | 0.576596 |
| <b>FGR2</b>  | <b>G4</b> | <b>Fruit</b> | <b>5</b> | 0.432185  | 1.00E-09 | 244,357  | 0.193804 | 0.624868  | 0.715783 | 1.00E-09 | 1.00E-09  | 0.732847 |
| <b>FGR3</b>  | <b>G4</b> | <b>Fruit</b> | <b>5</b> | 0.599177  | 0.725856 | 314,843  | 1.00E-09 | 0.797131  | 0.736726 | 0.913156 | 1.00E-09  | 20,581   |
| <b>GR4</b>   | <b>G4</b> | <b>Fruit</b> | <b>5</b> | 0.161599  | 1.00E-09 | 119,365  | 0.138712 | 0.0960382 | 107,051  | 1.00E-09 | 0.0901138 | 0.668665 |
| <b>FGR5</b>  | <b>G4</b> | <b>Fruit</b> | <b>5</b> | 1.00E-09  | 0.63102  | 935,702  | 1.00E-09 | 105,051   | 0.385511 | 182,786  | 1.00E-09  | 0.210072 |
| <b>FGR6</b>  | <b>G4</b> | <b>Fruit</b> | <b>5</b> | 0.425115  | 1.00E-09 | 219,659  | 0.336469 | 0.140669  | 0.525133 | 1.00E-09 | 0.182399  | 0.782757 |
| <b>FGR7</b>  | <b>G4</b> | <b>Fruit</b> | <b>5</b> | 1.00E-09  | 1.00E-09 | 0.606213 | 1.00E-09 | 1.00E-09  | 0.296811 | 0.570165 | 1.00E-09  | 0.372083 |
| <b>FGR8</b>  | <b>G4</b> | <b>Fruit</b> | <b>5</b> | 165,224   | 1.00E-09 | 108,316  | 1.00E-09 | 1.00E-09  | 0.570737 | 1.00E-09 | 1.00E-09  | 0.626292 |
| <b>FGR9</b>  | <b>G4</b> | <b>Fruit</b> | <b>5</b> | 1.00E-09  | 1.00E-09 | 136,781  | 1.00E-09 | 1.00E-09  | 176,695  | 1.00E-09 | 1.00E-09  | 0.887109 |
| <b>FGR10</b> | <b>G4</b> | <b>Fruit</b> | <b>5</b> | 1.00E-09  | 1.00E-09 | 1.00E-09 | 1.00E-09 | 1.00E-09  | 1.00E-09 | 1.00E-09 | 1.00E-09  | 1.00E-09 |
| <b>FGR11</b> | <b>G4</b> | <b>Fruit</b> | <b>5</b> | 1.00E-09  | 1.00E-09 | 107,603  | 1.00E-09 | 1.00E-09  | 0.148442 | 1.00E-09 | 1.00E-09  | 0.502245 |
| <b>FGR12</b> | <b>G4</b> | <b>Fruit</b> | <b>5</b> | 1.00E-09  | 1.00E-09 | 146,296  | 1.00E-09 | 1.00E-09  | 0.313147 | 1.00E-09 | 1.00E-09  | 0.932648 |

---

|             |           |        | Retention index | RI <sup>1055</sup>             | RI/* <sup>1080</sup> | RI <sup>1103</sup>               | RI <sup>1123</sup> | RI <sup>1156</sup>        | RI <sup>1158</sup> | RI <sup>1159</sup>                   | RI/* <sup>1161</sup> |
|-------------|-----------|--------|-----------------|--------------------------------|----------------------|----------------------------------|--------------------|---------------------------|--------------------|--------------------------------------|----------------------|
| Sample code | Phenology | Organ  | Maturity        | <i>trans</i> -sabinene hydrate | <i>β</i> -ocimene    | 2( <i>E</i> )-hexenyl propanoate | camphor            | 2,2,7,7-tetramethyloctane | isomenthone        | (2 <i>E</i> ,6 <i>Z</i> )-nonadienal | <i>p</i> -cymene     |
| EFR1        | G0        | Flower | 1               | 1.00E-09                       | 930,564              | 0.623804                         | 1.00E-09           | 0.958162                  | 1.00E-09           | 0.23246                              | 1.00E-09             |
| EFR2        | G0        | Flower | 1               | 1.00E-09                       | 224,713              | 0.228865                         | 1.00E-09           | 0.484428                  | 0.0550395          | 0.61206                              | 1.00E-09             |
| EFR3        | G0        | Flower | 1               | 0.264695                       | 259,999              | 0.582683                         | 1.00E-09           | 168,544                   | 0.0947487          | 1.00E-09                             | 1.00E-09             |
| EFR4        | G0        | Flower | 1               | 0.100555                       | 0.91956              | 0.762854                         | 1.00E-09           | 114,856                   | 1.00E-09           | 0.64375                              | 1.00E-09             |
| EFR5        | G0        | Flower | 1               | 1.00E-09                       | 348,899              | 193,543                          | 1.00E-09           | 167,483                   | 0.0838335          | 18,374                               | 1.00E-09             |
| EFR6        | G0        | Flower | 1               | 0.260031                       | 616,659              | 310,241                          | 1.00E-09           | 203,031                   | 1.00E-09           | 0.89533                              | 1.00E-09             |
| EFR7        | G0        | Flower | 1               | 0.316163                       | 207,071              | 243,335                          | 1.00E-09           | 242,657                   | 1.00E-09           | 246,886                              | 1.00E-09             |
| EFR8        | G0        | Flower | 1               | 0.170302                       | 1,514                | 0.992769                         | 1.00E-09           | 177,689                   | 0.121071           | 178,634                              | 1.00E-09             |
| EFR9        | G0        | Flower | 1               | 0.291131                       | 270,795              | 318,036                          | 1.00E-09           | 172,219                   | 0.0192116          | 1.00E-09                             | 1.00E-09             |
| EFR10       | G0        | Flower | 1               | 1.00E-09                       | 130,255              | 1.00E-09                         | 1.00E-09           | 0.623796                  | 1.00E-09           | 1.00E-09                             | 1.00E-09             |
| FCPR1       | G1        | Fruit  | 2               | 1.00E-09                       | 1.00E-09             | 0.0174174                        | 1.00E-09           | 1.00E-09                  | 1.00E-09           | 1.00E-09                             | 1.00E-09             |
| FCPR2       | G1        | Fruit  | 2               | 1.00E-09                       | 1.00E-09             | 0.835812                         | 0.257084           | 175,015                   | 1.00E-09           | 203,298                              | 0.65321              |
| FCPR3       | G1        | Fruit  | 2               | 0.159612                       | 1.00E-09             | 180,988                          | 1.00E-09           | 0.937674                  | 1.00E-09           | 1.00E-09                             | 1.00E-09             |
| FCPR4       | G1        | Fruit  | 2               | 0.283048                       | 1.00E-09             | 201,693                          | 0.557105           | 218,122                   | 1.00E-09           | 239,337                              | 1.00E-09             |
| FCHR1       | G2        | Fruit  | 3               | 0.316306                       | 1.00E-09             | 0.893162                         | 1.00E-09           | 157,681                   | 1.00E-09           | 222,062                              | 1.00E-09             |
| FCHR2       | G2        | Fruit  | 3               | 0.165998                       | 1.00E-09             | 103,383                          | 1.00E-09           | 19,325                    | 0.17305            | 170,368                              | 1.00E-09             |
| FCHR3       | G2        | Fruit  | 3               | 1.00E-09                       | 1.00E-09             | 0.518573                         | 0.215865           | 263,533                   | 1.00E-09           | 180,054                              | 146,519              |

|              |           |              |          |          |          |          |          |          |           |          |          |
|--------------|-----------|--------------|----------|----------|----------|----------|----------|----------|-----------|----------|----------|
| <b>FCHR4</b> | <b>G2</b> | <b>Fruit</b> | <b>3</b> | 1.00E-09 | 1.00E-09 | 0.464561 | 1.00E-09 | 101,614  | 1.00E-09  | 0.68751  | 0.41679  |
| <b>FMR1</b>  | <b>G3</b> | <b>Fruit</b> | <b>4</b> | 1.00E-09 | 1.00E-09 | 120,241  | 1.00E-09 | 0.705937 | 1.00E-09  | 0.94433  | 0.40120  |
| <b>FMR2</b>  | <b>G3</b> | <b>Fruit</b> | <b>4</b> | 1.00E-09 | 1.00E-09 | 0.715379 | 0.460322 | 146,788  | 1.00E-09  | 320,952  | 212,364  |
| <b>FMR3</b>  | <b>G3</b> | <b>Fruit</b> | <b>4</b> | 0.019195 | 1.00E-09 | 0.159537 | 0.024786 | 0.960685 | 0.040759  | 107,916  | 0.72855  |
| <b>FMR4</b>  | <b>G3</b> | <b>Fruit</b> | <b>4</b> | 1.00E-09 | 1.00E-09 | 0.156703 | 1.00E-09 | 201,189  | 1.00E-09  | 0.88983  | 185,874  |
| <b>FGR1</b>  | <b>G4</b> | <b>Fruit</b> | <b>5</b> | 0.133156 | 1.00E-09 | 0.457623 | 0.759363 | 301,388  | 0.0986171 | 0.65142  | 0.45031  |
| <b>FGR2</b>  | <b>G4</b> | <b>Fruit</b> | <b>5</b> | 1.00E-09 | 1.00E-09 | 142,119  | 1.00E-09 | 0.418825 | 1.00E-09  | 281,382  | 1.00E-09 |
| <b>FGR3</b>  | <b>G4</b> | <b>Fruit</b> | <b>5</b> | 0.863855 | 1.00E-09 | 384,847  | 0.8302   | 380,586  | 0.11972   | 326,333  | 1.00E-09 |
| <b>FGR4</b>  | <b>G4</b> | <b>Fruit</b> | <b>5</b> | 1.00E-09 | 1.00E-09 | 204,318  | 0.350583 | 270,752  | 1.00E-09  | 199,954  | 1.00E-09 |
| <b>FGR5</b>  | <b>G4</b> | <b>Fruit</b> | <b>5</b> | 1.00E-09 | 1.00E-09 | 0.173681 | 0.350587 | 19,784   | 1.00E-09  | 113,374  | 0.89956  |
| <b>FGR6</b>  | <b>G4</b> | <b>Fruit</b> | <b>5</b> | 1.00E-09 | 1.00E-09 | 103,488  | 1.00E-09 | 379,559  | 1.00E-09  | 206,105  | 137,741  |
| <b>FGR7</b>  | <b>G4</b> | <b>Fruit</b> | <b>5</b> | 1.00E-09 | 1.00E-09 | 0.586345 | 1.00E-09 | 174,899  | 1.00E-09  | 0.89553  | 0.33932  |
| <b>FGR8</b>  | <b>G4</b> | <b>Fruit</b> | <b>5</b> | 1.00E-09 | 1.00E-09 | 185,633  | 0.349691 | 350,412  | 1.00E-09  | 211,997  | 1.00E-09 |
| <b>FGR9</b>  | <b>G4</b> | <b>Fruit</b> | <b>5</b> | 1.00E-09 | 1.00E-09 | 138,076  | 1.00E-09 | 406,364  | 1.00E-09  | 271,191  | 1.00E-09 |
| <b>FGR10</b> | <b>G4</b> | <b>Fruit</b> | <b>5</b> | 1.00E-09 | 1.00E-09 | 1.00E-09 | 1.00E-09 | 1.00E-09 | 1.00E-09  | 105,538  | 1.00E-09 |
| <b>FGR11</b> | <b>G4</b> | <b>Fruit</b> | <b>5</b> | 1.00E-09 | 1.00E-09 | 0.651963 | 1.00E-09 | 286,981  | 1.00E-09  | 0.588131 | 1.00E-09 |
| <b>FGR12</b> | <b>G4</b> | <b>Fruit</b> | <b>5</b> | 1.00E-09 | 1.00E-09 | 0.78186  | 1.00E-09 | 305,136  | 0.0967465 | 276,197  | 1.00E-09 |

|             |           |        | Retention index | RI <sup>1162</sup>  | RI <sup>1165</sup>       | RI/* <sup>1171</sup>              | RI <sup>1175</sup> | RI <sup>1177</sup> | RI <sup>1184</sup> | RI <sup>1187</sup> | RI <sup>1189</sup> |
|-------------|-----------|--------|-----------------|---------------------|--------------------------|-----------------------------------|--------------------|--------------------|--------------------|--------------------|--------------------|
| Sample code | Phenology | Organ  | Maturity        | 3,7-dimethyl-decane | 4,6,8-trimethyl-1-nonene | (E)-4,8-dimethylnona-1,3,7-triene | ethylbenzoate      | cis-pinocamphone   | terpinen-4-ol      | p-cymen-8-ol       | 2-allylphenol      |
| EFR1        | G0        | Flower | 1               | 1.00E-09            | 0.387753                 | 1140.29                           | 1.00E-09           | 1.00E-09           | 0.0719744          | 1.00E-09           | 1.00E-09           |
| EFR2        | G0        | Flower | 1               | 0.214268            | 0.262726                 | 477,009                           | 1.00E-09           | 1.00E-09           | 0.0480196          | 0.0356373          | 1.00E-09           |
| EFR3        | G0        | Flower | 1               | 0.296468            | 0.395494                 | 156,613                           | 1.00E-09           | 1.00E-09           | 341,543            | 1.00E-09           | 1.00E-09           |
| EFR4        | G0        | Flower | 1               | 0.155035            | 0.424954                 | 186,504                           | 1.00E-09           | 0.0434394          | 0.0309599          | 1.00E-09           | 1.00E-09           |
| EFR5        | G0        | Flower | 1               | 0.577954            | 0.589396                 | 351,877                           | 0.0023875          | 0.064437           | 0.131067           | 0.0237114          | 1.00E-09           |
| EFR6        | G0        | Flower | 1               | 0.518332            | 852,646                  | 835,745                           | 0.0451215          | 0.0543278          | 0.108156           | 0.0524033          | 0.0226218          |
| EFR7        | G0        | Flower | 1               | 0.789813            | 117,591                  | 471,109                           | 0.0696629          | 0.104778           | 0.102473           | 0.0652824          | 0.0659887          |
| EFR8        | G0        | Flower | 1               | 0.140897            | 0.472924                 | 796,638                           | 0.0638078          | 0.0380366          | 866,318            | 1.00E-09           | 1.00E-09           |
| EFR9        | G0        | Flower | 1               | 0.726528            | 0.631749                 | 535,745                           | 0.0177714          | 0.0963587          | 0.0364087          | 0.0360633          | 0.0537046          |
| EFR10       | G0        | Flower | 1               | 1.00E-09            | 0.237064                 | 2365.96                           | 1.00E-09           | 1.00E-09           | 1.00E-09           | 1.00E-09           | 1.00E-09           |
| FCPR1       | G1        | Fruit  | 2               | 1.00E-09            | 1.00E-09                 | 0.0926047                         | 1.00E-09           | 1.00E-09           | 0.0597146          | 1.00E-09           | 1.00E-09           |
| FCPR2       | G1        | Fruit  | 2               | 0.367147            | 0.254073                 | 165,221                           | 0.302982           | 1.00E-09           | 0.479521           | 1.00E-09           | 1.00E-09           |
| FCPR3       | G1        | Fruit  | 2               | 0.40275             | 0.260116                 | 25,386                            | 1.00E-09           | 1.00E-09           | 0.0819079          | 1.00E-09           | 1.00E-09           |
| FCPR4       | G1        | Fruit  | 2               | 1.00E-09            | 0.630881                 | 230,928                           | 0.319101           | 1.00E-09           | 0.408977           | 1.00E-09           | 1.00E-09           |
| FCHR1       | G2        | Fruit  | 3               | 0.598091            | 0.52597                  | 210,963                           | 0.118917           | 0.0510444          | 0.1446             | 1.00E-09           | 0.0657669          |
| FCHR2       | G2        | Fruit  | 3               | 0.306612            | 0.314843                 | 486,141                           | 0.0801734          | 1.00E-09           | 0.2576             | 1.00E-09           | 1.00E-09           |
| FCHR3       | G2        | Fruit  | 3               | 1.00E-09            | 0.375153                 | 147,437                           | 0.359346           | 1.00E-09           | 0.749962           | 1.00E-09           | 0.0643229          |

|              |           |              |          |          |          |          |           |           |          |           |           |
|--------------|-----------|--------------|----------|----------|----------|----------|-----------|-----------|----------|-----------|-----------|
| <b>FCHR4</b> | <b>G2</b> | <b>Fruit</b> | <b>3</b> | 1.00E-09 | 0.127741 | 120,814  | 0.0532536 | 1.00E-09  | 0.130864 | 1.00E-09  | 0.0013509 |
| <b>FMR1</b>  | <b>G3</b> | <b>Fruit</b> | <b>4</b> | 1.00E-09 | 0.117796 | 0.360831 | 0.0439666 | 1.00E-09  | 0.086796 | 1.00E-09  | 1.00E-09  |
| <b>FMR2</b>  | <b>G3</b> | <b>Fruit</b> | <b>4</b> | 1.00E-09 | 0.660784 | 578,325  | 0.536119  | 0.184482  | 0.679231 | 1.00E-09  | 0.043598  |
| <b>FMR3</b>  | <b>G3</b> | <b>Fruit</b> | <b>4</b> | 1.00E-09 | 0.19308  | 146,196  | 0.0647881 | 0.0103749 | 0.21864  | 1.00E-09  | 1.00E-09  |
| <b>FMR4</b>  | <b>G3</b> | <b>Fruit</b> | <b>4</b> | 1.00E-09 | 0.32411  | 99,091   | 0.156457  | 1.00E-09  | 0.318215 | 1.00E-09  | 0.46567   |
| <b>FGR1</b>  | <b>G4</b> | <b>Fruit</b> | <b>5</b> | 1.00E-09 | 0.163105 | 221,764  | 0.324036  | 0.0456636 | 137,524  | 1.00E-09  | 0.133307  |
| <b>FGR2</b>  | <b>G4</b> | <b>Fruit</b> | <b>5</b> | 1.00E-09 | 0.582011 | 137,487  | 0.262703  | 1.00E-09  | 0.481231 | 0.0597594 | 0.0454397 |
| <b>FGR3</b>  | <b>G4</b> | <b>Fruit</b> | <b>5</b> | 100,224  | 0.898341 | 12,038   | 0.180299  | 1.00E-09  | 0.236331 | 1.00E-09  | 1.00E-09  |
| <b>FGR4</b>  | <b>G4</b> | <b>Fruit</b> | <b>5</b> | 0.356248 | 0.400073 | 329,188  | 1.00E-09  | 1.00E-09  | 0.107366 | 0.0449315 | 1.00E-09  |
| <b>FGR5</b>  | <b>G4</b> | <b>Fruit</b> | <b>5</b> | 1.00E-09 | 0.339587 | 311,239  | 0.353902  | 1.00E-09  | 0.503785 | 1.00E-09  | 1.00E-09  |
| <b>FGR6</b>  | <b>G4</b> | <b>Fruit</b> | <b>5</b> | 1.00E-09 | 0.282796 | 111,467  | 0.134612  | 1.00E-09  | 0.185064 | 1.00E-09  | 0.345834  |
| <b>FGR7</b>  | <b>G4</b> | <b>Fruit</b> | <b>5</b> | 0.356169 | 0.112537 | 394,415  | 1.00E-09  | 1.00E-09  | 0.250647 | 1.00E-09  | 1.00E-09  |
| <b>FGR8</b>  | <b>G4</b> | <b>Fruit</b> | <b>5</b> | 118,509  | 0.437567 | 622,678  | 0.152551  | 1.00E-09  | 0.463016 | 1.00E-09  | 0.273246  |
| <b>FGR9</b>  | <b>G4</b> | <b>Fruit</b> | <b>5</b> | 140,107  | 0.629875 | 308,192  | 0.0712036 | 1.00E-09  | 641,732  | 1.00E-09  | 1.00E-09  |
| <b>FGR10</b> | <b>G4</b> | <b>Fruit</b> | <b>5</b> | 0.568088 | 1.00E-09 | 1.00E-09 | 0.0400535 | 1.00E-09  | 1.00E-09 | 1.00E-09  | 1.00E-09  |
| <b>FGR11</b> | <b>G4</b> | <b>Fruit</b> | <b>5</b> | 116,835  | 0.297575 | 23,945   | 1.00E-09  | 1.00E-09  | 0.272164 | 1.00E-09  | 0.442798  |
| <b>FGR12</b> | <b>G4</b> | <b>Fruit</b> | <b>5</b> | 131,104  | 0.521852 | 349,188  | 0.22761   | 1.00E-09  | 0.733967 | 0.594327  | 0.883503  |

|             |           |        | Retention index | RI <sup>1196</sup> | RI <sup>1199</sup>                  | RI <sup>1203</sup> | RI <sup>1206</sup> | RI <sup>1214</sup> | RI/ <sup>*</sup> 1227 | RI <sup>1280</sup>           | RI <sup>1286</sup> |
|-------------|-----------|--------|-----------------|--------------------|-------------------------------------|--------------------|--------------------|--------------------|-----------------------|------------------------------|--------------------|
| Sample code | Phenology | Organ  | Maturity        | cryptone           | 2-methyl-propanoic acid hexyl ester | methyl chavicol    | <i>n</i> -decanal  | (-)-verbenone      | benzothiazole         | <i>cis</i> -verbenyl acetate | Phellandral        |
| EFR1        | G0        | Flower | 1               | 0.351285           | 0.0634903                           | 1.00E-09           | 0.158236           | 0.067178           | 0.173709              | 0.174469                     | 1.00E-09           |
| EFR2        | G0        | Flower | 1               | 1.00E-09           | 0.0892116                           | 0.0598543          | 1.00E-09           | 0.027956           | 1.00E-09              | 0.278419                     | 1.00E-09           |
| EFR3        | G0        | Flower | 1               | 1.00E-09           | 0.0719565                           | 0.0466871          | 1.00E-09           | 1.00E-09           | 0.00352346            | 0.134861                     | 1.00E-09           |
| EFR4        | G0        | Flower | 1               | 0.0037287          | 0.0688274                           | 1.00E-09           | 1.00E-09           | 0.003039           | 1.00E-09              | 1.00E-09                     | 0.001909           |
| EFR5        | G0        | Flower | 1               | 1.00E-09           | 0.0639206                           | 0.03979            | 1.00E-09           | 0.045229           | 0.105689              | 0.371274                     | 0.026610           |
| EFR6        | G0        | Flower | 1               | 0.113142           | 0.0603395                           | 0.0679984          | 1.00E-09           | 0.046580           | 0.207034              | 1.00E-09                     | 0.078674           |
| EFR7        | G0        | Flower | 1               | 1.00E-09           | 0.0520498                           | 0.0514586          | 0.0020910          | 0.077757           | 1.00E-09              | 1.00E-09                     | 0.043820           |
| EFR8        | G0        | Flower | 1               | 0.0626453          | 0.0918902                           | 0.0623707          | 1.00E-09           | 0.075194           | 1.00E-09              | 0.344645                     | 0.051103           |
| EFR9        | G0        | Flower | 1               | 0.0300647          | 0.100688                            | 0.0387149          | 1.00E-09           | 0.10461            | 1.00E-09              | 0.906742                     | 0.068268           |
| EFR10       | G0        | Flower | 1               | 0.538014           | 0.100059                            | 0.0656036          | 1.00E-09           | 1.00E-09           | 0.24385               | 0.268695                     | 0.191559           |
| FCPR1       | G1        | Fruit  | 2               | 1.00E-09           | 1.00E-09                            | 1.00E-09           | 1.00E-09           | 1.00E-09           | 0.111187              | 1.00E-09                     | 1.00E-09           |
| FCPR2       | G1        | Fruit  | 2               | 0.031311           | 0.171944                            | 0.165139           | 1.00E-09           | 1.00E-09           | 577,811               | 0.265175                     | 1.00E-09           |
| FCPR3       | G1        | Fruit  | 2               | 1.00E-09           | 0.0911113                           | 0.0110647          | 0.0351137          | 1.00E-09           | 1.00E-09              | 0.299995                     | 1.00E-09           |
| FCPR4       | G1        | Fruit  | 2               | 0.0706561          | 0.182271                            | 0.208483           | 1.00E-09           | 1.00E-09           | 0.987854              | 1.00E-09                     | 1.00E-09           |
| FCHR1       | G2        | Fruit  | 3               | 0.0270475          | 0.0811962                           | 0.0856107          | 1.00E-09           | 0.074069           | 0.135583              | 0.078722                     | 0.030090           |
| FCHR2       | G2        | Fruit  | 3               | 0.0336593          | 0.0929083                           | 0.0982734          | 1.00E-09           | 1.00E-09           | 0.363284              | 0.217967                     | 1.00E-09           |
| FCHR3       | G2        | Fruit  | 3               | 0.0074391          | 0.258182                            | 0.232771           | 0.0690017          | 1.00E-09           | 500,205               | 0.186404                     | 1.00E-09           |

|              |           |              |          |           |           |           |            |           |           |            |           |
|--------------|-----------|--------------|----------|-----------|-----------|-----------|------------|-----------|-----------|------------|-----------|
| <b>FCHR4</b> | <b>G2</b> | <b>Fruit</b> | <b>3</b> | 0.0032801 | 0.0434404 | 0.0639666 | 1.00E-09   | 1.00E-09  | 156,335   | 0.0859731  | 1.00E-09  |
| <b>FMR1</b>  | <b>G3</b> | <b>Fruit</b> | <b>4</b> | 0.0015800 | 0.0549292 | 1.00E-09  | 0.00224191 | 1.00E-09  | 0.123137  | 1.00E-09   | 1.00E-09  |
| <b>FMR2</b>  | <b>G3</b> | <b>Fruit</b> | <b>4</b> | 0.0952832 | 0.39575   | 0.309514  | 0.136953   | 1.00E-09  | 0.564938  | 0.0408373  | 1.00E-09  |
| <b>FMR3</b>  | <b>G3</b> | <b>Fruit</b> | <b>4</b> | 1.00E-09  | 0.1552    | 0.0402219 | 0.00141446 | 0.0139311 | 0.0672901 | 0.0377466  | 1.00E-09  |
| <b>FMR4</b>  | <b>G3</b> | <b>Fruit</b> | <b>4</b> | 1.00E-09  | 1.00E-09  | 1.00E-09  | 1.00E-09   | 1.00E-09  | 599,679   | 1.00E-09   | 1.00E-09  |
| <b>FGR1</b>  | <b>G4</b> | <b>Fruit</b> | <b>5</b> | 1.00E-09  | 0.454936  | 0.332538  | 0.21731    | 1.00E-09  | 106,638   | 0.00156152 | 0.374919  |
| <b>FGR2</b>  | <b>G4</b> | <b>Fruit</b> | <b>5</b> | 0.0724549 | 0.158447  | 0.194191  | 0.0813075  | 0.0196178 | 435,822   | 1.00E-09   | 1.00E-09  |
| <b>FGR3</b>  | <b>G4</b> | <b>Fruit</b> | <b>5</b> | 1.00E-09  | 0.100968  | 0.149812  | 1.00E-09   | 1.00E-09  | 300,215   | 0.642003   | 1.00E-09  |
| <b>FGR4</b>  | <b>G4</b> | <b>Fruit</b> | <b>5</b> | 1.00E-09  | 0.0538341 | 0.0789855 | 1.00E-09   | 1.00E-09  | 0.351655  | 0.709608   | 0.0575907 |
| <b>FGR5</b>  | <b>G4</b> | <b>Fruit</b> | <b>5</b> | 1.00E-09  | 0.30816   | 0.364561  | 1.00E-09   | 1.00E-09  | 181,932   | 1.00E-09   | 1.00E-09  |
| <b>FGR6</b>  | <b>G4</b> | <b>Fruit</b> | <b>5</b> | 1.00E-09  | 0.283867  | 0.138219  | 0.127605   | 0.0200079 | 210,557   | 0.520597   | 1.00E-09  |
| <b>FGR7</b>  | <b>G4</b> | <b>Fruit</b> | <b>5</b> | 1.00E-09  | 0.108263  | 0.0959747 | 0.0831229  | 1.00E-09  | 159,405   | 0.281213   | 1.00E-09  |
| <b>FGR8</b>  | <b>G4</b> | <b>Fruit</b> | <b>5</b> | 1.00E-09  | 0.26753   | 0.202115  | 1.00E-09   | 1.00E-09  | 240,851   | 0.385021   | 1.00E-09  |
| <b>FGR9</b>  | <b>G4</b> | <b>Fruit</b> | <b>5</b> | 1.00E-09  | 0.178524  | 0.170252  | 1.00E-09   | 1.00E-09  | 260,414   | 0.637249   | 1.00E-09  |
| <b>FGR10</b> | <b>G4</b> | <b>Fruit</b> | <b>5</b> | 1.00E-09  | 0.326555  | 0.123058  | 0.170252   | 1.00E-09  | 1.00E-09  | 1.00E-09   | 1.00E-09  |
| <b>FGR11</b> | <b>G4</b> | <b>Fruit</b> | <b>5</b> | 0.0149611 | 0.196508  | 0.123058  | 0.170252   | 0.114361  | 322,189   | 0.479495   | 1.00E-09  |
| <b>FGR12</b> | <b>G4</b> | <b>Fruit</b> | <b>5</b> | 1.00E-09  | 0.2808    | 0.140047  | 0.254145   | 1.00E-09  | 267,969   | 0.514509   | 1.00E-09  |



|             |           |        | Retention index | RI <sup>1291</sup> | RI <sup>1294</sup>         | RI <sup>1297</sup> | RI/* <sup>1299</sup> | RI <sup>1301</sup> | RI <sup>1307</sup> | RI <sup>1319</sup>                 | RI <sup>1332</sup>                 |
|-------------|-----------|--------|-----------------|--------------------|----------------------------|--------------------|----------------------|--------------------|--------------------|------------------------------------|------------------------------------|
| Sample code | Phenology | Organ  | Maturity        | thymol             | <i>E,E</i> -2,4-decadienal | dihydroedulan II   | 2-methyl-pentanal    | carvacrol          | piperitenone       | <i>trans,trans</i> -2,4-decadienal | oxalic acid allyl pentadecyl ester |
| EFR1        | G0        | Flower | 1               | 267,874            | 1.00E-09                   | 0.005753           | 0.063490             | 0.022057           | 0.07829            | 0.113899                           | 0.0671582                          |
| EFR2        | G0        | Flower | 1               | 0.142712           | 0.029811                   | 1.00E-09           | 0.009826             | 1.00E-09           | 0.10192            | 0.104722                           | 0.049317                           |
| EFR3        | G0        | Flower | 1               | 0.0528775          | 0.097374                   | 0.025536           | 0.055216             | 0.00482103         | 0.10897            | 0.156407                           | 0.0811677                          |
| EFR4        | G0        | Flower | 1               | 0.246036           | 1.00E-09                   | 1.00E-09           | 0.056849             | 1.00E-09           | 0.04585            | 1.00E-09                           | 1.00E-09                           |
| EFR5        | G0        | Flower | 1               | 0.0341919          | 1.00E-09                   | 1.00E-09           | 0.060260             | 1.00E-09           | 0.04448            | 0.091681                           | 1.00E-09                           |
| EFR6        | G0        | Flower | 1               | 0.444              | 1.00E-09                   | 1.00E-09           | 0.058176             | 0.000793065        | 0.03344            | 0.066395                           | 0.0093115                          |
| EFR7        | G0        | Flower | 1               | 1.00E-09           | 1.00E-09                   | 0.003824           | 0.047875             | 0.0160617          | 0.05990            | 0.076372                           | 0.0236244                          |
| EFR8        | G0        | Flower | 1               | 0.0583387          | 0.019899                   | 0.001608           | 0.074146             | 0.007254           | 0.08346            | 0.12492                            | 0.0656018                          |
| EFR9        | G0        | Flower | 1               | 0.140915           | 1.00E-09                   | 1.00E-09           | 0.093253             | 1.00E-09           | 0.09215            | 0.137788                           | 0.0548756                          |
| EFR10       | G0        | Flower | 1               | 974,122            | 1.00E-09                   | 1.00E-09           | 0.079145             | 1.00E-09           | 0.11131            | 1.00E-09                           | 0.0248446                          |
| FCPR1       | G1        | Fruit  | 2               | 1.00E-09           | 0.001134                   | 0.004800           | 1.00E-09             | 1.00E-09           | 0.13287            | 0.144085                           | 0.0936388                          |
| FCPR2       | G1        | Fruit  | 2               | 0.0538724          | 1.00E-09                   | 1.00E-09           | 1.00E-09             | 1.00E-09           | 0.19587            | 0.232897                           | 1.00E-09                           |
| FCPR3       | G1        | Fruit  | 2               | 0.0217553          | 1.00E-09                   | 1.00E-09           | 0.043349             | 1.00E-09           | 0.08286            | 0.091726                           | 0.0486656                          |
| FCPR4       | G1        | Fruit  | 2               | 1.00E-09           | 1.00E-09                   | 1.00E-09           | 1.00E-09             | 1.00E-09           | 1.00E-09           | 1.00E-09                           | 1.00E-09                           |
| FCHR1       | G2        | Fruit  | 3               | 1.00E-09           | 0.050329                   | 1.00E-09           | 0.069266             | 1.00E-09           | 0.18149            | 0.203382                           | 0.15238                            |
| FCHR2       | G2        | Fruit  | 3               | 1.00E-09           | 0.059402                   | 1.00E-09           | 1.00E-09             | 0.0496605          | 0.07176            | 0.107933                           | 1.00E-09                           |
| FCHR3       | G2        | Fruit  | 3               | 0.0312377          | 0.082283                   | 0.081863           | 0.061376             | 0.654447           | 0.14902            | 0.195445                           | 0.0871595                          |

|              |           |              |          |            |          |          |          |           |          |          |           |
|--------------|-----------|--------------|----------|------------|----------|----------|----------|-----------|----------|----------|-----------|
| <b>FCHR4</b> | <b>G2</b> | <b>Fruit</b> | <b>3</b> | 1.00E-09   | 0.012479 | 1.00E-09 | 0.014732 | 0.0228849 | 0.03676  | 0.033843 | 0.021979  |
| <b>FMR1</b>  | <b>G3</b> | <b>Fruit</b> | <b>4</b> | 1.00E-09   | 0.038224 | 0.021878 | 0.021225 | 0.0013843 | 0.09738  | 0.049573 | 0.0554419 |
| <b>FMR2</b>  | <b>G3</b> | <b>Fruit</b> | <b>4</b> | 0.0547444  | 0.278916 | 0.098727 | 0.087247 | 0.201856  | 0.18973  | 0.237878 | 0.149448  |
| <b>FMR3</b>  | <b>G3</b> | <b>Fruit</b> | <b>4</b> | 1.00E-09   | 0.046203 | 0.039231 | 0.051580 | 1.00E-09  | 0.07355  | 0.093214 | 0.0624862 |
| <b>FMR4</b>  | <b>G3</b> | <b>Fruit</b> | <b>4</b> | 1.00E-09   | 1.00E-09 | 1.00E-09 | 1.00E-09 | 0.255278  | 0.17934  | 0.295724 | 1.00E-09  |
| <b>FGR1</b>  | <b>G4</b> | <b>Fruit</b> | <b>5</b> | 0.00290304 | 175,965  | 0.390435 | 0.380764 | 0.195664  | 0.30024  | 0.292249 | 0.123032  |
| <b>FGR2</b>  | <b>G4</b> | <b>Fruit</b> | <b>5</b> | 1.00E-09   | 0.088452 | 1.00E-09 | 0.077809 | 0.120551  | 0.18013  | 0.226408 | 0.128738  |
| <b>FGR3</b>  | <b>G4</b> | <b>Fruit</b> | <b>5</b> | 1.00E-09   | 0.091836 | 0.037207 | 0.114333 | 1.00E-09  | 0.17053  | 0.252604 | 0.114279  |
| <b>FGR4</b>  | <b>G4</b> | <b>Fruit</b> | <b>5</b> | 0.369991   | 0.040931 | 0.008019 | 0.059301 | 0.0114435 | 0.13087  | 0.181823 | 0.0806193 |
| <b>FGR5</b>  | <b>G4</b> | <b>Fruit</b> | <b>5</b> | 1.00E-09   | 0.077566 | 0.158742 | 0.039319 | 0.389875  | 0.25376  | 0.212302 | 0.130929  |
| <b>FGR6</b>  | <b>G4</b> | <b>Fruit</b> | <b>5</b> | 1.00E-09   | 0.101725 | 0.16742  | 0.133719 | 0.298311  | 0.25183  | 0.284124 | 0.142848  |
| <b>FGR7</b>  | <b>G4</b> | <b>Fruit</b> | <b>5</b> | 1.00E-09   | 0.049594 | 0.167424 | 0.133718 | 0.298312  | 0.10088  | 0.147895 | 0.0559186 |
| <b>FGR8</b>  | <b>G4</b> | <b>Fruit</b> | <b>5</b> | 1.00E-09   | 0.094777 | 0.126097 | 0.228445 | 0.22879   | 0.22005  | 0.204966 | 0.0784164 |
| <b>FGR9</b>  | <b>G4</b> | <b>Fruit</b> | <b>5</b> | 0.0657234  | 0.030118 | 0.168978 | 0.193324 | 0.222845  | 0.20239  | 0.232687 | 0.0286782 |
| <b>FGR10</b> | <b>G4</b> | <b>Fruit</b> | <b>5</b> | 1.00E-09   | 115,946  | 0.3211   | 0.376626 | 1.00E-09  | 1.00E-09 | 1.00E-09 | 1.00E-09  |
| <b>FGR11</b> | <b>G4</b> | <b>Fruit</b> | <b>5</b> | 369,141    | 0.088974 | 0.160238 | 0.106326 | 1.00E-09  | 0.08517  | 0.144248 | 0.0331532 |
| <b>FGR12</b> | <b>G4</b> | <b>Fruit</b> | <b>5</b> | 0.00779191 | 0.032147 | 0.134489 | 0.071908 | 0.151973  | 0.15855  | 0.135134 | 1.00E-09  |

|             |           |        | Retention<br>index | RI <sup>1338</sup>                | RI <sup>1351</sup>     | RI <sup>1378</sup>   | RI <sup>1403</sup> | RI <sup>1404</sup> | RI <sup>1409</sup> | RI/* <sup>1413</sup> |
|-------------|-----------|--------|--------------------|-----------------------------------|------------------------|----------------------|--------------------|--------------------|--------------------|----------------------|
| Sample code | Phenology | Organ  | Maturity           | dimethoxy-<br>( <i>E</i> )-citral | citronellyl<br>acetate | carvacrol<br>acetate | tetradecane        | diacetyl glycerol  | $\alpha$ -cedrene  | $\beta$ -elemene     |
| EFR1        | G0        | Flower | 1                  | 0.016790                          | 1.00E-09               | 0.0237175            | 0.0333581          | 1.00E-09           | 1.00E-09           | 0.0894011            |
| EFR2        | G0        | Flower | 1                  | 0.057737                          | 0.006240               | 1.00E-09             | 0.0174141          | 1.00E-09           | 0.0664055          | 0.0641708            |
| EFR3        | G0        | Flower | 1                  | 0.116495                          | 270,591                | 0.0310803            | 1.00E-09           | 0.012934           | 0.0160222          | 0.010755             |
| EFR4        | G0        | Flower | 1                  | 1.00E-09                          | 1.00E-09               | 0.0232668            | 1.00E-09           | 0.000864           | 0.0549761          | 0.824593             |
| EFR5        | G0        | Flower | 1                  | 0.011502                          | 0.049120               | 1.00E-09             | 0.0555516          | 301,415            | 0.0757456          | 0.00249997           |
| EFR6        | G0        | Flower | 1                  | 0.011424                          | 0.023231               | 0.0111362            | 1.00E-09           | 906,363            | 1.00E-09           | 1.00E-09             |
| EFR7        | G0        | Flower | 1                  | 0.035115                          | 0.028437               | 1.00E-09             | 1.00E-09           | 1.00E-09           | 0.00318615         | 0.0813759            |
| EFR8        | G0        | Flower | 1                  | 1.00E-09                          | 395,993                | 1.00E-09             | 1.00E-09           | 252,032            | 0.0413913          | 1.00E-09             |
| EFR9        | G0        | Flower | 1                  | 0.012006                          | 0.008048               | 0.0261883            | 1.00E-09           | 248,753            | 1.00E-09           | 0.0247077            |
| EFR10       | G0        | Flower | 1                  | 0.015511                          | 1.00E-09               | 1.00E-09             | 1.00E-09           | 302,885            | 1.00E-09           | 0.044002             |
| FCPR1       | G1        | Fruit  | 2                  | 0.089926                          | 1.00E-09               | 1.00E-09             | 1.00E-09           | 0.002554           | 0.046804           | 1.00E-09             |
| FCPR2       | G1        | Fruit  | 2                  | 1.00E-09                          | 1.00E-09               | 1.00E-09             | 0.191334           | 1.00E-09           | 0.212705           | 439,743              |
| FCPR3       | G1        | Fruit  | 2                  | 1.00E-09                          | 1.00E-09               | 1.00E-09             | 1.00E-09           | 1.00E-09           | 1.00E-09           | 0.0636097            |
| FCPR4       | G1        | Fruit  | 2                  | 1.00E-09                          | 1.00E-09               | 1.00E-09             | 1.00E-09           | 1.00E-09           | 1.00E-09           | 12,998               |
| FCHR1       | G2        | Fruit  | 3                  | 0.049215                          | 0.064257               | 1.00E-09             | 0.0625243          | 1.00E-09           | 0.0647795          | 0.0554166            |
| FCHR2       | G2        | Fruit  | 3                  | 0.054889                          | 0.088255               | 1.00E-09             | 0.069171           | 285,212            | 0.112931           | 0.137875             |
| FCHR3       | G2        | Fruit  | 3                  | 0.129903                          | 0.146705               | 0.00821527           | 0.437995           | 0.058682           | 0.374278           | 0.460367             |

|              |           |              |          |          |           |            |           |          |           |           |
|--------------|-----------|--------------|----------|----------|-----------|------------|-----------|----------|-----------|-----------|
| <b>FCHR4</b> | <b>G2</b> | <b>Fruit</b> | <b>3</b> | 0.022857 | 0.055471  | 1.00E-09   | 0.0946255 | 1.00E-09 | 0.0832792 | 0.0656214 |
| <b>FMR1</b>  | <b>G3</b> | <b>Fruit</b> | <b>4</b> | 0.020494 | 0.020745  | 0.0167421  | 1.00E-09  | 252,588  | 0.0308228 | 1.00E-09  |
| <b>FMR2</b>  | <b>G3</b> | <b>Fruit</b> | <b>4</b> | 0.287979 | 0.058153  | 0.0310226  | 0.814077  | 1.00E-09 | 0.780787  | 0.202321  |
| <b>FMR3</b>  | <b>G3</b> | <b>Fruit</b> | <b>4</b> | 0.047777 | 0.069798  | 0.00637506 | 0.11291   | 1.00E-09 | 0.0805672 | 0.0486553 |
| <b>FMR4</b>  | <b>G3</b> | <b>Fruit</b> | <b>4</b> | 0.24455  | 0.079609  | 1.00E-09   | 0.471934  | 1.00E-09 | 0.587329  | 1.00E-09  |
| <b>FGR1</b>  | <b>G4</b> | <b>Fruit</b> | <b>5</b> | 196,309  | 109,015   | 0.183845   | 0.219346  | 376,606  | 0.864166  | 0.0722395 |
| <b>FGR2</b>  | <b>G4</b> | <b>Fruit</b> | <b>5</b> | 0.113113 | 0.151535  | 0.023295   | 0.248956  | 342,389  | 1.00E-09  | 0.264964  |
| <b>FGR3</b>  | <b>G4</b> | <b>Fruit</b> | <b>5</b> | 0.108472 | 0.084235  | 1.00E-09   | 0.12482   | 0.049635 | 1.00E-09  | 1.00E-09  |
| <b>FGR4</b>  | <b>G4</b> | <b>Fruit</b> | <b>5</b> | 1.00E-09 | 0.030182  | 1.00E-09   | 1.00E-09  | 447,243  | 0.0454203 | 1.00E-09  |
| <b>FGR5</b>  | <b>G4</b> | <b>Fruit</b> | <b>5</b> | 0.080627 | 0.237665  | 0.449609   | 1.00E-09  | 405,049  | 0.522055  | 1.00E-09  |
| <b>FGR6</b>  | <b>G4</b> | <b>Fruit</b> | <b>5</b> | 0.109054 | 0.17327   | 1.00E-09   | 0.647802  | 294,065  | 0.724647  | 0.273645  |
| <b>FGR7</b>  | <b>G4</b> | <b>Fruit</b> | <b>5</b> | 0.051971 | 0.12004   | 1.00E-09   | 0.340669  | 157,329  | 0.482351  | 0.186802  |
| <b>FGR8</b>  | <b>G4</b> | <b>Fruit</b> | <b>5</b> | 0.079464 | 0.0687097 | 1.00E-09   | 0.730408  | 844,528  | 0.772457  | 1.00E-09  |
| <b>FGR9</b>  | <b>G4</b> | <b>Fruit</b> | <b>5</b> | 0.083440 | 0.0384045 | 1.00E-09   | 0.527426  | 346,436  | 0.689496  | 1.00E-09  |
| <b>FGR10</b> | <b>G4</b> | <b>Fruit</b> | <b>5</b> | 1.00E-09 | 161,525   | 0.210011   | 0.651855  | 322,344  | 0.537699  | 0.153982  |
| <b>FGR11</b> | <b>G4</b> | <b>Fruit</b> | <b>5</b> | 0.006332 | 0.142555  | 1.00E-09   | 0.596049  | 401,798  | 0.864166  | 0.181944  |
| <b>FGR12</b> | <b>G4</b> | <b>Fruit</b> | <b>5</b> | 0.063153 | 0.0891381 | 1.00E-09   | 0.50579   | 213,379  | 0.639272  | 0.170724  |

|             |           |        | Retention index | RI <sup>1415</sup>            | RI <sup>1416</sup>  | RI/ <sup>*</sup> 1420                | RI <sup>1437</sup> | RI <sup>1442</sup> | RI <sup>1447</sup> |
|-------------|-----------|--------|-----------------|-------------------------------|---------------------|--------------------------------------|--------------------|--------------------|--------------------|
| Sample code | Phenology | Organ  | Maturity        | <i>cis</i> -threo-davanafuran | $\alpha$ -farnesene | ( <i>E</i> )- $\beta$ -caryophyllene | humulene           | $\alpha$ -guaiene  | seychellene        |
| EFR1        | G0        | Flower | 1               | 0.0255308                     | 0.0140149           | 0.300425                             | 0.024114           | 0.117142           | 0.0571334          |
| EFR2        | G0        | Flower | 1               | 1.00E-09                      | 1.00E-09            | 0.270343                             | 0.0225496          | 1.00E-09           | 0.0423957          |
| EFR3        | G0        | Flower | 1               | 0.146108                      | 1.00E-09            | 0.0294545                            | 0.0608578          | 1.00E-09           | 0.0828602          |
| EFR4        | G0        | Flower | 1               | 0.0936956                     | 1.00E-09            | 0.181783                             | 0.0608578          | 1.00E-09           | 0.0644218          |
| EFR5        | G0        | Flower | 1               | 0.0202401                     | 1.00E-09            | 0.170571                             | 0.0368824          | 1.00E-09           | 0.101921           |
| EFR6        | G0        | Flower | 1               | 0.0401912                     | 0.0153788           | 0.0995547                            | 1.00E-09           | 0.0971422          | 0.0361316          |
| EFR7        | G0        | Flower | 1               | 0.0505737                     | 0.0175377           | 0.445411                             | 0.0341708          | 1.00E-09           | 0.0409478          |
| EFR8        | G0        | Flower | 1               | 0.0711762                     | 0.0109565           | 0.121034                             | 0.0160275          | 0.0570389          | 0.0626911          |
| EFR9        | G0        | Flower | 1               | 0.0761017                     | 0.0158601           | 0.198541                             | 1.00E-09           | 0.13366            | 0.0431835          |
| EFR10       | G0        | Flower | 1               | 0.0660228                     | 1.00E-09            | 0.272048                             | 0.0518485          | 0.980415           | 0.0357047          |
| FCPR1       | G1        | Fruit  | 2               | 0.110647                      | 1.00E-09            | 0.62039                              | 1.00E-09           | 0.297176           | 0.0759436          |
| FCPR2       | G1        | Fruit  | 2               | 0.202227                      | 0.2735              | 154,834                              | 160,881            | 1.00E-09           | 0.165278           |
| FCPR3       | G1        | Fruit  | 2               | 0.0696398                     | 1.00E-09            | 0.907135                             | 0.0485933          | 1.00E-09           | 0.0714389          |
| FCPR4       | G1        | Fruit  | 2               | 1.00E-09                      | 1.00E-09            | 669,364                              | 0.581476           | 1.00E-09           | 1.00E-09           |
| FCHR1       | G2        | Fruit  | 3               | 0.0731704                     | 0.041232            | 0.107541                             | 0.0414241          | 1.00E-09           | 0.0864136          |
| FCHR2       | G2        | Fruit  | 3               | 0.0955433                     | 0.0590257           | 0.881867                             | 0.0853526          | 0.107775           | 0.0616562          |
| FCHR3       | G2        | Fruit  | 3               | 0.286086                      | 0.233067            | 316,199                              | 0.299745           | 1.00E-09           | 0.18917            |

|              |           |              |          |           |           |            |           |           |           |
|--------------|-----------|--------------|----------|-----------|-----------|------------|-----------|-----------|-----------|
| <b>FCHR4</b> | <b>G2</b> | <b>Fruit</b> | <b>3</b> | 0.0457834 | 0.0794539 | 0.477777   | 0.0381447 | 1.00E-09  | 0.0376349 |
| <b>FMR1</b>  | <b>G3</b> | <b>Fruit</b> | <b>4</b> | 0.0304033 | 0.0289398 | 0.00372409 | 0.0165324 | 0.207803  | 0.0389981 |
| <b>FMR2</b>  | <b>G3</b> | <b>Fruit</b> | <b>4</b> | 0.363661  | 0.240438  | 0.421258   | 0.0890672 | 1.00E-09  | 0.332157  |
| <b>FMR3</b>  | <b>G3</b> | <b>Fruit</b> | <b>4</b> | 0.0824854 | 0.0373096 | 0.0482983  | 0.0324191 | 1.00E-09  | 0.0599476 |
| <b>FMR4</b>  | <b>G3</b> | <b>Fruit</b> | <b>4</b> | 0.269952  | 0.309016  | 0.268719   | 1.00E-09  | 1.00E-09  | 0.404114  |
| <b>FGR1</b>  | <b>G4</b> | <b>Fruit</b> | <b>5</b> | 210,911   | 0.289476  | 0.341433   | 0.214708  | 0.0190876 | 0.304452  |
| <b>FGR2</b>  | <b>G4</b> | <b>Fruit</b> | <b>5</b> | 0.283775  | 0.253861  | 0.270039   | 0.0558558 | 0.119243  | 0.181106  |
| <b>FGR3</b>  | <b>G4</b> | <b>Fruit</b> | <b>5</b> | 0.159788  | 0.159647  | 0.174024   | 3.49E-06  | 1.00E-09  | 0.125584  |
| <b>FGR4</b>  | <b>G4</b> | <b>Fruit</b> | <b>5</b> | 0.157045  | 1.00E-09  | 0.0277846  | 0.02177   | 0.21149   | 1.00E-09  |
| <b>FGR5</b>  | <b>G4</b> | <b>Fruit</b> | <b>5</b> | 0.617135  | 0.323704  | 0.223067   | 0.108734  | 0.535033  | 1.00E-09  |
| <b>FGR6</b>  | <b>G4</b> | <b>Fruit</b> | <b>5</b> | 0.310418  | 0.276717  | 146,816    | 0.197221  | 0.064038  | 0.192214  |
| <b>FGR7</b>  | <b>G4</b> | <b>Fruit</b> | <b>5</b> | 0.227477  | 1.00E-09  | 102,677    | 0.112343  | 1.00E-09  | 1.00E-09  |
| <b>FGR8</b>  | <b>G4</b> | <b>Fruit</b> | <b>5</b> | 0.360381  | 0.285673  | 0.966434   | 0.148744  | 1.00E-09  | 1.00E-09  |
| <b>FGR9</b>  | <b>G4</b> | <b>Fruit</b> | <b>5</b> | 0.392502  | 0.266432  | 0.526147   | 0.113596  | 1.00E-09  | 1.00E-09  |
| <b>FGR10</b> | <b>G4</b> | <b>Fruit</b> | <b>5</b> | 121,166   | 0.230715  | 1.00E-09   | 0.320482  | 1.00E-09  | 0.0744345 |
| <b>FGR11</b> | <b>G4</b> | <b>Fruit</b> | <b>5</b> | 0.416924  | 0.300585  | 0.393417   | 0.161828  | 1.00E-09  | 1.00E-09  |
| <b>FGR12</b> | <b>G4</b> | <b>Fruit</b> | <b>5</b> | 0.417833  | 0.125837  | 0.534909   | 0.17889   | 0.0677432 | 0.165557  |

|             |           |        | Retention index | RI <sup>1460</sup>                                                | RI <sup>1472</sup> | RI <sup>1487</sup> | RI <sup>1500</sup> | RI <sup>1502</sup>  | RI <sup>1508</sup>  | RI <sup>1521</sup> |
|-------------|-----------|--------|-----------------|-------------------------------------------------------------------|--------------------|--------------------|--------------------|---------------------|---------------------|--------------------|
| Sample code | Phenology | Organ  | Maturity        | 1,5-bis(1,1-dimethylethyl)-3,3-dimethyl-bicyclo[3.1.0]hexan-2-one | germacrene D       | $\beta$ -selinene  | $\gamma$ -elemene  | $\alpha$ -muurolene | $\alpha$ -bulnesene | $\gamma$ -cadinene |
| EFR1        | G0        | Flower | 1               | 0.0251095                                                         | 0.0738538          | 0.0164891          | 0.058351           | 0.0188517           | 0.025154            | 0.739281           |
| EFR2        | G0        | Flower | 1               | 0.00696072                                                        | 0.0032263          | 1.00E-09           | 0.029934           | 1.00E-09            | 0.008494            | 0.662334           |
| EFR3        | G0        | Flower | 1               | 0.0582114                                                         | 0.100236           | 0.0684689          | 0.125537           | 0.0890045           | 138,427             | 0.656507           |
| EFR4        | G0        | Flower | 1               | 0.0254303                                                         | 1.00E-09           | 0.0281256          | 0.031455           | 0.0141716           | 1.00E-09            | 367,062            |
| EFR5        | G0        | Flower | 1               | 0.0419628                                                         | 0.103823           | 1.00E-09           | 0.044156           | 0.0337215           | 0.024825            | 0.397833           |
| EFR6        | G0        | Flower | 1               | 0.0122731                                                         | 0.0266481          | 1.00E-09           | 0.024440           | 0.0150183           | 1.00E-09            | 0.175545           |
| EFR7        | G0        | Flower | 1               | 0.034028                                                          | 0.0463599          | 0.0122566          | 0.042142           | 0.0143436           | 1.00E-09            | 0.424631           |
| EFR8        | G0        | Flower | 1               | 0.0842517                                                         | 0.121707           | 0.0466957          | 0.054022           | 0.0220778           | 204,268             | 0.713625           |
| EFR9        | G0        | Flower | 1               | 0.023586                                                          | 0.162182           | 0.0251923          | 0.040029           | 0.0259819           | 0.008887            | 0.766212           |
| EFR10       | G0        | Flower | 1               | 0.0899261                                                         | 0.112263           | 0.0066442          | 0.040029           | 0.0064069           | 0.249126            | 0.698108           |
| FCPR1       | G1        | Fruit  | 2               | 0.580369                                                          | 0.0452374          | 1.00E-09           | 0.170115           | 0.0328592           | 0.215638            | 0.394496           |
| FCPR2       | G1        | Fruit  | 2               | 0.562839                                                          | 132,259            | 1.00E-09           | 0.620776           | 0.464853            | 1.00E-09            | 0.859164           |
| FCPR3       | G1        | Fruit  | 2               | 1.00E-09                                                          | 0.0887065          | 1.00E-09           | 0.052733           | 1.00E-09            | 1.00E-09            | 0.592531           |
| FCPR4       | G1        | Fruit  | 2               | 1.00E-09                                                          | 0.303316           | 1.00E-09           | 0.295055           | 0.282371            | 1.00E-09            | 0.628378           |
| FCHR1       | G2        | Fruit  | 3               | 0.078576                                                          | 0.121303           | 0.0326376          | 0.064595           | 0.0488084           | 0.028899            | 0.689315           |
| FCHR2       | G2        | Fruit  | 3               | 1.00E-09                                                          | 0.0824138          | 1.00E-09           | 0.087316           | 0.0557513           | 1.00E-09            | 0.381452           |
| FCHR3       | G2        | Fruit  | 3               | 0.971922                                                          | 0.137604           | 0.0376711          | 0.239254           | 0.216816            | 0.107039            | 107,695            |

|              |           |              |          |           |           |           |           |           |          |          |
|--------------|-----------|--------------|----------|-----------|-----------|-----------|-----------|-----------|----------|----------|
| <b>FCHR4</b> | <b>G2</b> | <b>Fruit</b> | <b>3</b> | 0.228678  | 0.0471265 | 1.00E-09  | 0.028362  | 0.0264591 | 1.00E-09 | 0.258894 |
| <b>FMR1</b>  | <b>G3</b> | <b>Fruit</b> | <b>4</b> | 1.00E-09  | 0.0867308 | 0.0283199 | 0.045863  | 0.0313075 | 0.018284 | 0.235951 |
| <b>FMR2</b>  | <b>G3</b> | <b>Fruit</b> | <b>4</b> | 0.171396  | 0.246218  | 0.0647428 | 0.169083  | 0.400228  | 0.092947 | 0.940153 |
| <b>FMR3</b>  | <b>G3</b> | <b>Fruit</b> | <b>4</b> | 0.0274885 | 0.0580827 | 1.00E-09  | 0.078989  | 0.0492758 | 0.025597 | 0.529867 |
| <b>FMR4</b>  | <b>G3</b> | <b>Fruit</b> | <b>4</b> | 111,776   | 1.00E-09  | 1.00E-09  | 0.140254  | 0.145334  | 0.25841  | 161,493  |
| <b>FGR1</b>  | <b>G4</b> | <b>Fruit</b> | <b>5</b> | 0.028901  | 0.328527  | 0.315176  | 179,041   | 20,415    | 716,926  | 689,083  |
| <b>FGR2</b>  | <b>G4</b> | <b>Fruit</b> | <b>5</b> | 0.373537  | 0.18506   | 0.0623161 | 0.144779  | 0.148451  | 0.074185 | 0.730193 |
| <b>FGR3</b>  | <b>G4</b> | <b>Fruit</b> | <b>5</b> | 0.163061  | 0.158385  | 1.00E-09  | 0.167694  | 0.0928748 | 0.044200 | 108,618  |
| <b>FGR4</b>  | <b>G4</b> | <b>Fruit</b> | <b>5</b> | 0.0998784 | 0.0870583 | 1.00E-09  | 0.0596041 | 0.0629298 | 1.00E-09 | 0.721174 |
| <b>FGR5</b>  | <b>G4</b> | <b>Fruit</b> | <b>5</b> | 121,057   | 1.00E-09  | 1.00E-09  | 1.00E-09  | 0.396286  | 0.123743 | 0.920394 |
| <b>FGR6</b>  | <b>G4</b> | <b>Fruit</b> | <b>5</b> | 185,723   | 0.258002  | 0.0599379 | 0.208979  | 0.307075  | 0.168677 | 133,588  |
| <b>FGR7</b>  | <b>G4</b> | <b>Fruit</b> | <b>5</b> | 117,183   | 1.00E-09  | 1.00E-09  | 1.00E-09  | 0.138864  | 0.133379 | 0.671733 |
| <b>FGR8</b>  | <b>G4</b> | <b>Fruit</b> | <b>5</b> | 219,225   | 1.00E-09  | 1.00E-09  | 1.00E-09  | 0.201311  | 0.101087 | 105,293  |
| <b>FGR9</b>  | <b>G4</b> | <b>Fruit</b> | <b>5</b> | 219,968   | 1.00E-09  | 1.00E-09  | 1.00E-09  | 0.270228  | 0.113375 | 108,752  |
| <b>FGR10</b> | <b>G4</b> | <b>Fruit</b> | <b>5</b> | 225,842   | 0.424968  | 0.142952  | 110,146   | 108,974   | 101,258  | 813,786  |
| <b>FGR11</b> | <b>G4</b> | <b>Fruit</b> | <b>5</b> | 283,022   | 0.11542   | 0.072619  | 0.168534  | 0.299194  | 0.174382 | 106,974  |
| <b>FGR12</b> | <b>G4</b> | <b>Fruit</b> | <b>5</b> | 256,398   | 0.0999694 | 0.0341426 | 0.117218  | 0.302352  | 0.119776 | 0.798877 |



|             |           |        | Retention index | RI <sup>1539</sup> | RI <sup>1555</sup>         | RI <sup>1566</sup>        | RI/ <sup>*</sup> 1581 | RI <sup>1599</sup> | RI <sup>1609</sup>                    | RI <sup>1612</sup>   |
|-------------|-----------|--------|-----------------|--------------------|----------------------------|---------------------------|-----------------------|--------------------|---------------------------------------|----------------------|
| Sample code | Phenology | Organ  | Maturity        | $\delta$ -cadinene | cis- $\alpha$ -copaen-8-ol | <i>n</i> -dodecanoic acid | nerolidol             | isocyperol         | 4,4,5,7,8-pentamethyl dihydrocoumarin | hummulene epoxide II |
| EFR1        | G0        | Flower | 1               | 0.139955           | 0.108711                   | 0.234486                  | 0.214411              | 0.283792           | 1.00E-09                              | 1.00E-09             |
| EFR2        | G0        | Flower | 1               | 0.124578           | 0.124134                   | 0.256881                  | 0.204781              | 0.188827           | 1.00E-09                              | 1.00E-09             |
| EFR3        | G0        | Flower | 1               | 0.158514           | 0.133912                   | 0.395725                  | 0.280461              | 0.0265464          | 0.0293878                             | 1.00E-09             |
| EFR4        | G0        | Flower | 1               | 0.116884           | 0.0896224                  | 0.190328                  | 0.159664              | 0.0588438          | 0.00896224                            | 1.00E-09             |
| EFR5        | G0        | Flower | 1               | 0.0691046          | 0.0602703                  | 0.151052                  | 0.137667              | 0.135096           | 0.221598                              | 1.00E-09             |
| EFR6        | G0        | Flower | 1               | 0.0396144          | 0.0260602                  | 0.0940864                 | 0.0822625             | 0.0145913          | 0.329666                              | 0.0834715            |
| EFR7        | G0        | Flower | 1               | 0.0997548          | 0.0779001                  | 0.163906                  | 0.125022              | 0.147051           | 1.00E-09                              | 1.00E-09             |
| EFR8        | G0        | Flower | 1               | 0.128449           | 0.118682                   | 0.275428                  | 0.233304              | 0.0832265          | 0.410407                              | 0.0434279            |
| EFR9        | G0        | Flower | 1               | 0.117724           | 0.115476                   | 0.239889                  | 0.226582              | 0.0643513          | 0.15756                               | 0.0414293            |
| EFR10       | G0        | Flower | 1               | 0.134498           | 0.133224                   | 0.248754                  | 0.229976              | 0.0499027          | 0.217843                              | 0.0225745            |
| FCPR1       | G1        | Fruit  | 2               | 0.199679           | 0.148384                   | 0.334396                  | 0.309192              | 0.13227            | 0.027002                              | 1.00E-09             |
| FCPR2       | G1        | Fruit  | 2               | 141,786            | 1.00E-09                   | 0.335064                  | 104,453               | 0.292364           | 0.248591                              | 1.00E-09             |
| FCPR3       | G1        | Fruit  | 2               | 0.136513           | 0.0806965                  | 0.105097                  | 0.157063              | 0.116633           | 0.0357556                             | 1.00E-09             |
| FCPR4       | G1        | Fruit  | 2               | 0.634179           | 1.00E-09                   | 1.00E-09                  | 0.46939               | 1.00E-09           | 113,535                               | 1.00E-09             |
| FCHR1       | G2        | Fruit  | 3               | 0.168213           | 0.151001                   | 0.309813                  | 0.26807               | 0.201596           | 0.498077                              | 1.00E-09             |
| FCHR2       | G2        | Fruit  | 3               | 0.1568             | 0.119421                   | 0.244334                  | 0.178937              | 0.150637           | 116,372                               | 0.0693615            |
| FCHR3       | G2        | Fruit  | 3               | 0.353246           | 0.123273                   | 0.377165                  | 0.423625              | 0.104164           | 0.738574                              | 0.0145612            |

|              |           |              |          |          |           |           |           |           |           |           |
|--------------|-----------|--------------|----------|----------|-----------|-----------|-----------|-----------|-----------|-----------|
| <b>FCHR4</b> | <b>G2</b> | <b>Fruit</b> | <b>3</b> | 0.073817 | 0.0255514 | 0.0638804 | 0.0592453 | 0.0280708 | 0.0948314 | 1.00E-09  |
| <b>FMR1</b>  | <b>G3</b> | <b>Fruit</b> | <b>4</b> | 0.111914 | 0.110003  | 0.215168  | 0.191061  | 0.152445  | 0.131723  | 0.0424472 |
| <b>FMR2</b>  | <b>G3</b> | <b>Fruit</b> | <b>4</b> | 0.366761 | 0.222582  | 0.398013  | 0.382499  | 0.246436  | 452,839   | 0.0731283 |
| <b>FMR3</b>  | <b>G3</b> | <b>Fruit</b> | <b>4</b> | 0.12202  | 0.111879  | 0.254308  | 0.21044   | 0.181114  | 0.25191   | 1.00E-09  |
| <b>FMR4</b>  | <b>G3</b> | <b>Fruit</b> | <b>4</b> | 0.254069 | 1.00E-09  | 0.299472  | 0.454819  | 1.00E-09  | 0.880093  | 1.00E-09  |
| <b>FGR1</b>  | <b>G4</b> | <b>Fruit</b> | <b>5</b> | 0.53997  | 0.119439  | 22,564    | 155,146   | 11,427    | 276,725   | 0.267878  |
| <b>FGR2</b>  | <b>G4</b> | <b>Fruit</b> | <b>5</b> | 0.235916 | 0.23975   | 0.424813  | 0.358794  | 0.143334  | 0.761793  | 1.00E-09  |
| <b>FGR3</b>  | <b>G4</b> | <b>Fruit</b> | <b>5</b> | 0.231698 | 0.208743  | 0.436691  | 0.390635  | 0.282652  | 0.426579  | 1.00E-09  |
| <b>FGR4</b>  | <b>G4</b> | <b>Fruit</b> | <b>5</b> | 0.156614 | 0.145936  | 0.311561  | 0.277166  | 0.138435  | 101,679   | 0.0544388 |
| <b>FGR5</b>  | <b>G4</b> | <b>Fruit</b> | <b>5</b> | 1.00E-09 | 1.00E-09  | 0.41      | 0.473574  | 1.00E-09  | 147,638   | 1.00E-09  |
| <b>FGR6</b>  | <b>G4</b> | <b>Fruit</b> | <b>5</b> | 0.433958 | 0.239444  | 0.453516  | 0.415708  | 0.350163  | 154,201   | 0.107297  |
| <b>FGR7</b>  | <b>G4</b> | <b>Fruit</b> | <b>5</b> | 0.27362  | 1.00E-09  | 0.291413  | 0.232672  | 1.00E-09  | 0.786278  | 1.00E-09  |
| <b>FGR8</b>  | <b>G4</b> | <b>Fruit</b> | <b>5</b> | 0.330137 | 1.00E-09  | 0.35834   | 0.293948  | 1.00E-09  | 192,275   | 1.00E-09  |
| <b>FGR9</b>  | <b>G4</b> | <b>Fruit</b> | <b>5</b> | 0.337779 | 1.00E-09  | 0.370024  | 0.319324  | 1.00E-09  | 143,212   | 1.00E-09  |
| <b>FGR10</b> | <b>G4</b> | <b>Fruit</b> | <b>5</b> | 0.450485 | 0.0387499 | 196,397   | 0.790155  | 0.465243  | 178,156   | 0.1529    |
| <b>FGR11</b> | <b>G4</b> | <b>Fruit</b> | <b>5</b> | 0.310626 | 0.153007  | 0.315553  | 0.388466  | 0.21251   | 16,245    | 0.0761188 |
| <b>FGR12</b> | <b>G4</b> | <b>Fruit</b> | <b>5</b> | 0.252968 | 0.1139    | 0.276824  | 0.350967  | 0.116342  | 151,607   | 0.0359086 |

|             |           |        | Retention index | RI <sup>1616</sup> | RI <sup>1619</sup> | RI <sup>1624</sup>    | RI <sup>1640</sup> | RI <sup>1658</sup> | RI <sup>1681</sup> | RI <sup>1693</sup>  | RI <sup>1701</sup> |
|-------------|-----------|--------|-----------------|--------------------|--------------------|-----------------------|--------------------|--------------------|--------------------|---------------------|--------------------|
| Sample code | Phenology | Organ  | Maturity        | $\tau$ -cadinol    | 1,10-diepi-cubenol | <i>epi</i> -1-cubenol | benzophenone       | $\beta$ -eudesmol  | tetradecanol       | $\alpha$ -bisabolol | geranyl tiglate    |
| EFR1        | G0        | Flower | 1               | 0.10563            | 1.00E-09           | 1.00E-09              | 0.15872            | 1.00E-09           | 0.0389632          | 0.0940149           | 0.0278728          |
| EFR2        | G0        | Flower | 1               | 0.11739            | 1.00E-09           | 1.00E-09              | 0.147798           | 1.00E-09           | 1.00E-09           | 0.0363082           | 0.0433528          |
| EFR3        | G0        | Flower | 1               | 0.107427           | 1.00E-09           | 1.00E-09              | 0.396904           | 1.00E-09           | 0.0623093          | 0.0625247           | 0.00594936         |
| EFR4        | G0        | Flower | 1               | 0.138815           | 1.00E-09           | 1.00E-09              | 0.232505           | 1.00E-09           | 0.0172718          | 0.162819            | 0.0187343          |
| EFR5        | G0        | Flower | 1               | 0.0830871          | 0.0749788          | 0.00444781            | 0.0389669          | 0.0340283          | 0.0177299          | 0.0275099           | 0.0123721          |
| EFR6        | G0        | Flower | 1               | 0.0550321          | 0.122409           | 0.0677489             | 0.136951           | 1.00E-09           | 0.00323881         | 0.0356103           | 0.0814639          |
| EFR7        | G0        | Flower | 1               | 0.0724007          | 1.00E-09           | 1.00E-09              | 0.0901844          | 1.00E-09           | 0.050419           | 0.0258225           | 1.00E-09           |
| EFR8        | G0        | Flower | 1               | 0.1                | 0.157643           | 0.0658947             | 0.0652311          | 0.079332           | 0.0817529          | 0.054032            | 0.0706636          |
| EFR9        | G0        | Flower | 1               | 0.0653697          | 0.0540052          | 0.0167933             | 0.0695468          | 0.038338           | 0.0589763          | 0.0998134           | 0.0060928          |
| EFR10       | G0        | Flower | 1               | 0.0879012          | 0.121383           | 1.00E-09              | 0.0478857          | 1.00E-09           | 0.00556057         | 0.0417636           | 1.00E-09           |
| FCPR1       | G1        | Fruit  | 2               | 0.0609571          | 1.00E-09           | 1.00E-09              | 0.0381146          | 1.00E-09           | 0.0703873          | 0.137078            | 0.0627706          |
| FCPR2       | G1        | Fruit  | 2               | 0.289203           | 1.00E-09           | 1.00E-09              | 1.00E-09           | 1.00E-09           | 1.00E-09           | 1.00E-09            | 1.00E-09           |
| FCPR3       | G1        | Fruit  | 2               | 0.0857231          | 1.00E-09           | 1.00E-09              | 0.0792771          | 1.00E-09           | 1.00E-09           | 1.00E-09            | 1.00E-09           |
| FCPR4       | G1        | Fruit  | 2               | 0.26538            | 1.00E-09           | 1.00E-09              | 1.00E-09           | 1.00E-09           | 1.00E-09           | 1.00E-09            | 1.00E-09           |
| FCHR1       | G2        | Fruit  | 3               | 1.00E-09           | 1.00E-09           | 1.00E-09              | 0.0975285          | 1.00E-09           | 0.067369           | 0.0516361           | 1.00E-09           |
| FCHR2       | G2        | Fruit  | 3               | 0.147539           | 0.254044           | 0.12592               | 0.0935523          | 0.083552           | 1.00E-09           | 1.00E-09            | 1.00E-09           |
| FCHR3       | G2        | Fruit  | 3               | 0.45485            | 0.091483           | 0.0171575             | 0.115008           | 1.00E-09           | 0.0250558          | 0.0633335           | 0.0860827          |

|              |           |              |          |           |          |           |           |          |           |           |                |
|--------------|-----------|--------------|----------|-----------|----------|-----------|-----------|----------|-----------|-----------|----------------|
| <b>FCHR4</b> | <b>G2</b> | <b>Fruit</b> | <b>3</b> | 0.0782971 | 1.00E-09 | 1.00E-09  | 0.0412386 | 1.00E-09 | 0.0125286 | 0.019291  | 0.0123267      |
| <b>FMR1</b>  | <b>G3</b> | <b>Fruit</b> | <b>4</b> | 0.0759314 | 0.031587 | 1.00E-09  | 0.0241343 | 0.005141 | 0.0494805 | 0.0223352 | 0.0040736<br>6 |
| <b>FMR2</b>  | <b>G3</b> | <b>Fruit</b> | <b>4</b> | 0.689476  | 0.018171 | 1.00E-09  | 0.0446599 | 1.00E-09 | 1.00E-09  | 1.00E-09  | 1.00E-09       |
| <b>FMR3</b>  | <b>G3</b> | <b>Fruit</b> | <b>4</b> | 0.178141  | 0.023548 | 1.00E-09  | 0.0736117 | 1.00E-09 | 0.0783889 | 0.0359018 | 1.00E-09       |
| <b>FMR4</b>  | <b>G3</b> | <b>Fruit</b> | <b>4</b> | 0.772911  | 1.00E-09 | 1.00E-09  | 0.308548  | 1.00E-09 | 1.00E-09  | 1.00E-09  | 1.00E-09       |
| <b>FGR1</b>  | <b>G4</b> | <b>Fruit</b> | <b>5</b> | 12,434    | 0.376752 | 0.165551  | 0.196945  | 0.089528 | 0.155824  | 0.193619  | 0.400615       |
| <b>FGR2</b>  | <b>G4</b> | <b>Fruit</b> | <b>5</b> | 1.00E-09  | 1.00E-09 | 1.00E-09  | 0.180677  | 0.12579  | 0.0590472 | 0.123171  | 0.127788       |
| <b>FGR3</b>  | <b>G4</b> | <b>Fruit</b> | <b>5</b> | 0.193879  | 1.00E-09 | 1.00E-09  | 1.00E-09  | 1.00E-09 | 1.00E-09  | 1.00E-09  | 1.00E-09       |
| <b>FGR4</b>  | <b>G4</b> | <b>Fruit</b> | <b>5</b> | 0.106292  | 0.278376 | 0.176722  | 0.0724114 | 0.12485  | 1.00E-09  | 0.0744634 | 1.00E-09       |
| <b>FGR5</b>  | <b>G4</b> | <b>Fruit</b> | <b>5</b> | 0.802611  | 0.392099 | 1.00E-09  | 1.00E-09  | 1.00E-09 | 1.00E-09  | 1.00E-09  | 1.00E-09       |
| <b>FGR6</b>  | <b>G4</b> | <b>Fruit</b> | <b>5</b> | 0.566477  | 0.269588 | 0.0979106 | 0.166913  | 1.00E-09 | 0.121897  | 0.0888032 | 0.0729669      |
| <b>FGR7</b>  | <b>G4</b> | <b>Fruit</b> | <b>5</b> | 0.293074  | 1.00E-09 | 1.00E-09  | 1.00E-09  | 1.00E-09 | 1.00E-09  | 1.00E-09  | 1.00E-09       |
| <b>FGR8</b>  | <b>G4</b> | <b>Fruit</b> | <b>5</b> | 0.484847  | 0.541911 | 1.00E-09  | 1.00E-09  | 1.00E-09 | 1.00E-09  | 1.00E-09  | 1.00E-09       |
| <b>FGR9</b>  | <b>G4</b> | <b>Fruit</b> | <b>5</b> | 0.518968  | 1.00E-09 | 1.00E-09  | 1.00E-09  | 1.00E-09 | 1.00E-09  | 1.00E-09  | 1.00E-09       |
| <b>FGR10</b> | <b>G4</b> | <b>Fruit</b> | <b>5</b> | 0.752774  | 0.295442 | 0.0552114 | 0.0720463 | 0.115984 | 0.211778  | 0.0502816 | 0.450208       |
| <b>FGR11</b> | <b>G4</b> | <b>Fruit</b> | <b>5</b> | 0.635015  | 0.225727 | 0.0903792 | 0.178403  | 0.119344 | 0.0904794 | 0.121306  | 0.0815817      |
| <b>FGR12</b> | <b>G4</b> | <b>Fruit</b> | <b>5</b> | 0.573683  | 0.261438 | 0.156844  | 0.160614  | 0.065710 | 0.0288572 | 0.0806784 | 0.0422768      |

|             |           |        | Retention index | RI <sup>1713</sup> | RI <sup>1722</sup>    | RI <sup>1766</sup>       | RI <sup>1775</sup> | RI <sup>1779</sup> | RI <sup>1789</sup> | RI <sup>1795</sup> | RI <sup>1809</sup>               |
|-------------|-----------|--------|-----------------|--------------------|-----------------------|--------------------------|--------------------|--------------------|--------------------|--------------------|----------------------------------|
| Sample code | Phenology | Organ  | Maturity        | tetradecanal       | methyl tetradecanoate | 12-hydroxy sesquicineole | tetradecanoic acid | phenantrene        | aristolone         | 4-hydroxy coumarin | 2,6,10,14-tetramethyl-hexadecane |
| EFR1        | G0        | Flower | 1               | 0.0318422          | 0.0779678             | 0.109426                 | 0.0797315          | 0.0692978          | 0.0459645          | 0.294506           | 0.213771                         |
| EFR2        | G0        | Flower | 1               | 0.0274827          | 1.00E-09              | 0.102255                 | 0.149549           | 0.140255           | 0.0776877          | 0.329201           | 0.251114                         |
| EFR3        | G0        | Flower | 1               | 0.0506773          | 0.0552572             | 0.228445                 | 0.215141           | 0.136563           | 0.0662123          | 0.35512            | 0.282969                         |
| EFR4        | G0        | Flower | 1               | 0.0238953          | 0.0532054             | 0.0594602                | 0.133436           | 0.0866914          | 0.00579554         | 0.158667           | 0.161477                         |
| EFR5        | G0        | Flower | 1               | 0.0337522          | 1.00E-09              | 0.0662979                | 0.0365845          | 1.00E-09           | 1.00E-09           | 0.202145           | 1.00E-09                         |
| EFR6        | G0        | Flower | 1               | 0.0774154          | 0.136551              | 1.00E-09                 | 0.0186786          | 0.0178967          | 1.00E-09           | 0.104768           | 1.00E-09                         |
| EFR7        | G0        | Flower | 1               | 1.00E-09           | 0.00310283            | 0.0715317                | 0.0784516          | 0.0748726          | 0.0519109          | 0.220595           | 0.13681                          |
| EFR8        | G0        | Flower | 1               | 0.217977           | 0.146064              | 0.130833                 | 0.0717895          | 0.0798947          | 0.0646636          | 0.382636           | 1.00E-09                         |
| EFR9        | G0        | Flower | 1               | 0.0782463          | 0.133108              | 0.147829                 | 0.0543686          | 0.0942275          | 1.00E-09           | 0.376138           | 0.391308                         |
| EFR10       | G0        | Flower | 1               | 0.051453           | 0.0578837             | 0.121953                 | 0.0410596          | 0.0852119          | 1.00E-09           | 0.275276           | 1.00E-09                         |
| FCPR1       | G1        | Fruit  | 2               | 0.0287924          | 0.0608259             | 0.205806                 | 0.764985           | 1.00E-09           | 0.426074           | 0.606962           | 0.598157                         |
| FCPR2       | G1        | Fruit  | 2               | 1.00E-09           | 1.00E-09              | 1.00E-09                 | 1.00E-09           | 1.00E-09           | 1.00E-09           | 0.373873           | 0.257238                         |
| FCPR3       | G1        | Fruit  | 2               | 1.00E-09           | 1.00E-09              | 1.00E-09                 | 0.0753445          | 0.0807055          | 1.00E-09           | 0.142516           | 0.127527                         |
| FCPR4       | G1        | Fruit  | 2               | 1.00E-09           | 1.00E-09              | 1.00E-09                 | 1.00E-09           | 1.00E-09           | 1.00E-09           | 1.00E-09           | 1.00E-09                         |
| FCHR1       | G2        | Fruit  | 3               | 0.0278697          | 0.051348              | 0.145326                 | 0.0449472          | 0.0791446          | 0.0715913          | 0.432245           | 0.292562                         |
| FCHR2       | G2        | Fruit  | 3               | 0.151285           | 0.102532              | 0.148238                 | 0.0719148          | 0.0784455          | 0.0532479          | 0.325002           | 0.411343                         |
| FCHR3       | G2        | Fruit  | 3               | 0.237374           | 1.00E-09              | 0.0998131                | 0.1382             | 0.101989           | 0.0332601          | 0.270054           | 0.234018                         |

|              |           |              |          |            |           |          |           |           |            |           |           |
|--------------|-----------|--------------|----------|------------|-----------|----------|-----------|-----------|------------|-----------|-----------|
| <b>FCHR4</b> | <b>G2</b> | <b>Fruit</b> | <b>3</b> | 0.0370173  | 0.0413327 | 1.00E-09 | 1.00E-09  | 1.00E-09  | 1.00E-09   | 0.0750757 | 0.0581905 |
| <b>FMR1</b>  | <b>G3</b> | <b>Fruit</b> | <b>4</b> | 0.0218691  | 0.0859664 | 0.106689 | 0.101497  | 0.130343  | 0.015493   | 0.26889   | 0.234366  |
| <b>FMR2</b>  | <b>G3</b> | <b>Fruit</b> | <b>4</b> | 0.00087242 | 0.0514441 | 1.00E-09 | 1.00E-09  | 1.00E-09  | 0.00297312 | 1.00E-09  | 1.00E-09  |
| <b>FMR3</b>  | <b>G3</b> | <b>Fruit</b> | <b>4</b> | 0.060458   | 0.136989  | 0.129189 | 0.0692983 | 0.0508003 | 0.0448589  | 0.32824   | 0.279852  |
| <b>FMR4</b>  | <b>G3</b> | <b>Fruit</b> | <b>4</b> | 0.365665   | 1.00E-09  | 1.00E-09 | 1.00E-09  | 1.00E-09  | 1.00E-09   | 0.598599  | 1.00E-09  |
| <b>FGR1</b>  | <b>G4</b> | <b>Fruit</b> | <b>5</b> | 148,052    | 0.540474  | 208,991  | 11,097    | 0.072563  | 0.425064   | 0.417813  | 0.0636986 |
| <b>FGR2</b>  | <b>G4</b> | <b>Fruit</b> | <b>5</b> | 0.23718    | 0.0714833 | 0.232379 | 0.130244  | 0.179497  | 0.0839288  | 0.544735  | 1.00E-09  |
| <b>FGR3</b>  | <b>G4</b> | <b>Fruit</b> | <b>5</b> | 0.137901   | 1.00E-09  | 0.188411 | 0.132764  | 1.00E-09  | 1.00E-09   | 0.505256  | 0.418743  |
| <b>FGR4</b>  | <b>G4</b> | <b>Fruit</b> | <b>5</b> | 0.199069   | 0.0680694 | 0.154401 | 0.0594369 | 0.0835976 | 1.00E-09   | 0.385935  | 0.370773  |
| <b>FGR5</b>  | <b>G4</b> | <b>Fruit</b> | <b>5</b> | 0.40449    | 0.490071  | 1.00E-09 | 1.00E-09  | 1.00E-09  | 1.00E-09   | 1.00E-09  | 0.693802  |
| <b>FGR6</b>  | <b>G4</b> | <b>Fruit</b> | <b>5</b> | 0.362034   | 0.145977  | 0.256052 | 0.163792  | 0.195271  | 0.072024   | 0.599264  | 0.852523  |
| <b>FGR7</b>  | <b>G4</b> | <b>Fruit</b> | <b>5</b> | 0.215321   | 1.00E-09  | 1.00E-09 | 1.00E-09  | 1.00E-09  | 1.00E-09   | 0.347847  | 0.36095   |
| <b>FGR8</b>  | <b>G4</b> | <b>Fruit</b> | <b>5</b> | 0.273315   | 0.247111  | 1.00E-09 | 1.00E-09  | 1.00E-09  | 1.00E-09   | 0.44724   | 0.521388  |
| <b>FGR9</b>  | <b>G4</b> | <b>Fruit</b> | <b>5</b> | 0.344976   | 1.00E-09  | 1.00E-09 | 1.00E-09  | 1.00E-09  | 1.00E-09   | 0.425279  | 0.529481  |
| <b>FGR10</b> | <b>G4</b> | <b>Fruit</b> | <b>5</b> | 171,401    | 0.599772  | 239,474  | 109,043   | 1.00E-09  | 0.466429   | 0.441545  | 0.0223593 |
| <b>FGR11</b> | <b>G4</b> | <b>Fruit</b> | <b>5</b> | 0.301401   | 0.242271  | 0.152271 | 0.0979088 | 0.0913308 | 0.071615   | 0.420155  | 0.515337  |
| <b>FGR12</b> | <b>G4</b> | <b>Fruit</b> | <b>5</b> | 0.345395   | 0.31263   | 0.112395 | 0.0485846 | 0.0589749 | 0.0111144  | 0.267932  | 1.00E-09  |

|             |           |        | Retention index | RI <sup>1827</sup>       | RI <sup>1844</sup>           | RI <sup>1860</sup> | RI <sup>1900</sup> | RI <sup>1905</sup>                | RI <sup>1909</sup> | RI <sup>1931</sup>             | RI <sup>1962</sup>     |
|-------------|-----------|--------|-----------------|--------------------------|------------------------------|--------------------|--------------------|-----------------------------------|--------------------|--------------------------------|------------------------|
| Sample code | Phenology | Organ  | Maturity        | isopropyl tetradecanoate | eudesm-7(11)-en-4-ol acetate | Pentadecanoic acid | nonadecane         | 11-hexadecenoic acid methyl ester | evodione           | hexadecanoic acid methyl ester | (Z,Z)-geranyl linalool |
| EFR1        | G0        | Flower | 1               | 0.129054                 | 0.202701                     | 1.00E-09           | 0.0714746          | 1.00E-09                          | 0.0118835          | 1.00E-09                       | 0.00747212             |
| EFR2        | G0        | Flower | 1               | 0.155514                 | 0.202892                     | 1.00E-09           | 0.0161068          | 0.0393273                         | 1.00E-09           | 0.00162302                     | 0.0146565              |
| EFR3        | G0        | Flower | 1               | 0.185579                 | 0.236138                     | 1.00E-09           | 0.0358705          | 0.0262439                         | 0.0131655          | 0.0323214                      | 0.0227614              |
| EFR4        | G0        | Flower | 1               | 1.00E-09                 | 0.231513                     | 0.0401699          | 0.0355951          | 0.0188672                         | 0.0222455          | 1.00E-09                       | 1.00E-09               |
| EFR5        | G0        | Flower | 1               | 0.107412                 | 0.137361                     | 0.0168914          | 0.0590178          | 0.00121164                        | 0.0307308          | 0.0290897                      | 0.044018               |
| EFR6        | G0        | Flower | 1               | 0.0550265                | 0.103409                     | 0.043663           | 0.0796171          | 1.00E-09                          | 1.00E-09           | 1.00E-09                       | 1.00E-09               |
| EFR7        | G0        | Flower | 1               | 0.128085                 | 0.16228                      | 1.00E-09           | 0.0104036          | 0.00307506                        | 0.0148198          | 0.00793166                     | 0.0189106              |
| EFR8        | G0        | Flower | 1               | 0.180636                 | 0.22859                      | 0.0266316          | 0.0429703          | 1.00E-09                          | 0.0364256          | 0.0205217                      | 0.0175332              |
| EFR9        | G0        | Flower | 1               | 0.182829                 | 0.233097                     | 0.0463152          | 0.0303249          | 1.00E-09                          | 1.00E-09           | 0.0142808                      | 1.00E-09               |
| EFR10       | G0        | Flower | 1               | 0.137053                 | 0.145587                     | 0.0583899          | 0.0764083          | 1.00E-09                          | 1.00E-09           | 0.0140477                      | 0.00576622             |
| FCPR1       | G1        | Fruit  | 2               | 0.560359                 | 0.314216                     | 1.00E-09           | 0.0512799          | 1.00E-09                          | 1.00E-09           | 1.00E-09                       | 0.00467654             |
| FCPR2       | G1        | Fruit  | 2               | 0.212183                 | 0.317669                     | 1.00E-09           | 1.00E-09           | 1.00E-09                          | 1.00E-09           | 1.00E-09                       | 1.00E-09               |
| FCPR3       | G1        | Fruit  | 2               | 1.00E-09                 | 0.111715                     | 1.00E-09           | 1.00E-09           | 1.00E-09                          | 1.00E-09           | 1.00E-09                       | 1.00E-09               |
| FCPR4       | G1        | Fruit  | 2               | 1.00E-09                 | 1.00E-09                     | 1.00E-09           | 1.00E-09           | 1.00E-09                          | 1.00E-09           | 1.00E-09                       | 1.00E-09               |
| FCHR1       | G2        | Fruit  | 3               | 0.20913                  | 0.23849                      | 1.00E-09           | 0.0482552          | 0.0547712                         | 0.0615215          | 1.00E-09                       | 0.0237626              |
| FCHR2       | G2        | Fruit  | 3               | 0.140728                 | 0.17422                      | 1.00E-09           | 0.0854705          | 1.00E-09                          | 1.00E-09           | 1.00E-09                       | 1.00E-09               |

|              |           |              |          |           |           |            |           |           |                       |            |            |
|--------------|-----------|--------------|----------|-----------|-----------|------------|-----------|-----------|-----------------------|------------|------------|
| <b>FCHR3</b> | <b>G2</b> | <b>Fruit</b> | <b>3</b> | 0.171969  | 0.27511   | 1.00E-09   | 0.168771  | 1.00E-09  | 1.00E-09              | 0.0679905  | 0.0106367  |
| <b>FCHR4</b> | <b>G2</b> | <b>Fruit</b> | <b>3</b> | 0.0370114 | 0.0547358 | 0.00213516 | 0.0345665 | 1.00E-09  | 0.015061 <sub>8</sub> | 1.00E-09   | 1.00E-09   |
| <b>FMR1</b>  | <b>G3</b> | <b>Fruit</b> | <b>4</b> | 0.147416  | 0.192651  | 0.0217573  | 1.00E-09  | 1.00E-09  | 1.00E-09              | 0.00502449 | 0.00542533 |
| <b>FMR2</b>  | <b>G3</b> | <b>Fruit</b> | <b>4</b> | 1.00E-09  | 1.00E-09  | 1.00E-09   | 0.0644443 | 1.00E-09  | 1.00E-09              | 1.00E-09   | 1.00E-09   |
| <b>FMR3</b>  | <b>G3</b> | <b>Fruit</b> | <b>4</b> | 0.21868   | 0.233539  | 1.00E-09   | 0.113447  | 1.00E-09  | 0.029810 <sub>3</sub> | 1.00E-09   | 1.00E-09   |
| <b>FMR4</b>  | <b>G3</b> | <b>Fruit</b> | <b>4</b> | 0.350967  | 0.303714  | 1.00E-09   | 0.22371   | 1.00E-09  | 1.00E-09              | 1.00E-09   | 1.00E-09   |
| <b>FGR1</b>  | <b>G4</b> | <b>Fruit</b> | <b>5</b> | 0.0341938 | 0.492762  | 1.00E-09   | 0.124956  | 0.0237678 | 141,866               | 0.547786   | 1.00E-09   |
| <b>FGR2</b>  | <b>G4</b> | <b>Fruit</b> | <b>5</b> | 0.267815  | 0.440066  | 0.0671882  | 0.105008  | 1.00E-09  | 1.00E-09              | 0.0160699  | 0.0171443  |
| <b>FGR3</b>  | <b>G4</b> | <b>Fruit</b> | <b>5</b> | 0.315772  | 0.356897  | 1.00E-09   | 1.00E-09  | 1.00E-09  | 1.00E-09              | 1.00E-09   | 1.00E-09   |
| <b>FGR4</b>  | <b>G4</b> | <b>Fruit</b> | <b>5</b> | 0.141323  | 0.285046  | 1.00E-09   | 0.0851414 | 1.00E-09  | 1.00E-09              | 1.00E-09   | 1.00E-09   |
| <b>FGR5</b>  | <b>G4</b> | <b>Fruit</b> | <b>5</b> | 1.00E-09  | 0.38429   | 1.00E-09   | 1.00E-09  | 1.00E-09  | 1.00E-09              | 1.00E-09   | 1.00E-09   |
| <b>FGR6</b>  | <b>G4</b> | <b>Fruit</b> | <b>5</b> | 0.186835  | 0.379756  | 0.0961177  | 0.322697  | 0.0177149 | 0.059666 <sub>4</sub> | 0.0099075  | 1.00E-09   |
| <b>FGR7</b>  | <b>G4</b> | <b>Fruit</b> | <b>5</b> | 0.199884  | 0.260735  | 1.00E-09   | 1.00E-09  | 1.00E-09  | 1.00E-09              | 1.00E-09   | 1.00E-09   |
| <b>FGR8</b>  | <b>G4</b> | <b>Fruit</b> | <b>5</b> | 1.00E-09  | 1.00E-09  | 1.00E-09   | 0.292177  | 1.00E-09  | 1.00E-09              | 1.00E-09   | 1.00E-09   |
| <b>FGR9</b>  | <b>G4</b> | <b>Fruit</b> | <b>5</b> | 1.00E-09  | 0.378186  | 1.00E-09   | 1.00E-09  | 1.00E-09  | 1.00E-09              | 1.00E-09   | 1.00E-09   |
| <b>FGR10</b> | <b>G4</b> | <b>Fruit</b> | <b>5</b> | 1.00E-09  | 0.574604  | 1.00E-09   | 0.303158  | 0.734963  | 0.316499              | 0.296198   | 1.00E-09   |
| <b>FGR11</b> | <b>G4</b> | <b>Fruit</b> | <b>5</b> | 0.201753  | 0.30114   | 0.197619   | 0.211552  | 1.00E-09  | 1.00E-09              | 0.0835021  | 1.00E-09   |
| <b>FGR12</b> | <b>G4</b> | <b>Fruit</b> | <b>5</b> | 0.120943  | 0.251268  | 0.109254   | 0.165988  | 1.00E-09  | 1.00E-09              | 1.00E-09   | 1.00E-09   |



|             |           |        |          | Retention index | RI <sup>1977</sup> | RI <sup>1989</sup>  | RI <sup>1995</sup> | 2013       | RI <sup>2017</sup> | RI <sup>2020</sup> | RI <sup>2045</sup>  | RI <sup>2077</sup> |
|-------------|-----------|--------|----------|-----------------|--------------------|---------------------|--------------------|------------|--------------------|--------------------|---------------------|--------------------|
| Sample code | Phenology | Organ  | Maturity | bifloratriene   | catalponol         | ethyl hexadecanoate | unknown            | juvabione  | warburganal        | canellal           | octadecanol acetate |                    |
| EFR1        | G0        | Flower | 1        | 0.0319496       | 0.122714           | 0.017976            | 0.026014           | 0.0344486  | 1.00E-09           | 0.0844527          | 0.030252            |                    |
| EFR2        | G0        | Flower | 1        | 0.105516        | 0.048725           | 0.0285927           | 0.0763952          | 0.0424303  | 1.00E-09           | 0.115727           | 0.0279958           |                    |
| EFR3        | G0        | Flower | 1        | 0.0772237       | 0.0989337          | 1.00E-09            | 555,363            | 0.0283159  | 1.00E-09           | 0.00397479         | 0.0475538           |                    |
| EFR4        | G0        | Flower | 1        | 1.00E-09        | 1.00E-09           | 0.156885            | 1.00E-09           | 1.00E-09   | 1.00E-09           | 0.0364291          | 0.0421582           |                    |
| EFR5        | G0        | Flower | 1        | 0.0326428       | 1.00E-09           | 0.0527142           | 0.0134661          | 1.00E-09   | 1.00E-09           | 1.00E-09           | 0.00179957          |                    |
| EFR6        | G0        | Flower | 1        | 1.00E-09        | 0.243682           | 1.00E-09            | 1.00E-09           | 1.00E-09   | 1.00E-09           | 0.0052187          | 0.00682147          |                    |
| EFR7        | G0        | Flower | 1        | 1.00E-09        | 0.0713572          | 0.0585927           | 0.0394163          | 0.0126176  | 0.0581721          | 1.00E-09           | 0.01824             |                    |
| EFR8        | G0        | Flower | 1        | 0.0748055       | 0.104618           | 0.0446773           | 0.883538           | 0.0334142  | 0.0495835          | 0.0687002          | 0.0196018           |                    |
| EFR9        | G0        | Flower | 1        | 0.0842852       | 0.147071           | 0.0264261           | 1.00E-09           | 0.0313658  | 1.00E-09           | 1.00E-09           | 0.0669311           |                    |
| EFR10       | G0        | Flower | 1        | 0.103159        | 0.0351273          | 0.0461456           | 0.0413681          | 0.00764874 | 0.0538339          | 0.016658           | 0.0359341           |                    |
| FCPR1       | G1        | Fruit  | 2        | 0.00708426      | 0.0898189          | 0.0592825           | 0.105986           | 1.00E-09   | 1.00E-09           | 0.113726           | 0.0430149           |                    |
| FCPR2       | G1        | Fruit  | 2        | 1.00E-09        | 1.00E-09           | 1.00E-09            | 1.00E-09           | 1.00E-09   | 1.00E-09           | 1.00E-09           | 1.00E-09            |                    |
| FCPR3       | G1        | Fruit  | 2        | 1.00E-09        | 1.00E-09           | 1.00E-09            | 1.00E-09           | 1.00E-09   | 1.00E-09           | 1.00E-09           | 1.00E-09            |                    |
| FCPR4       | G1        | Fruit  | 2        | 1.00E-09        | 1.00E-09           | 1.00E-09            | 1.00E-09           | 1.00E-09   | 1.00E-09           | 1.00E-09           | 1.00E-09            |                    |
| FCHR1       | G2        | Fruit  | 3        | 0.0792829       | 0.058421           | 0.0381738           | 0.151865           | 0.0403791  | 0.105627           | 0.102285           | 0.0590972           |                    |
| FCHR2       | G2        | Fruit  | 3        | 1.00E-09        | 1.00E-09           | 1.00E-09            | 1.00E-09           | 1.00E-09   | 0.0585087          | 1.00E-09           | 1.00E-09            |                    |
| FCHR3       | G2        | Fruit  | 3        | 0.0697888       | 0.268376           | 1.00E-09            | 0.0366872          | 0.0275427  | 0.0426615          | 1.00E-09           | 0.00738992          |                    |

|              |           |              |          |            |           |           |           |            |            |           |           |
|--------------|-----------|--------------|----------|------------|-----------|-----------|-----------|------------|------------|-----------|-----------|
| <b>FCHR4</b> | <b>G2</b> | <b>Fruit</b> | <b>3</b> | 0.00690153 | 0.146528  | 1.00E-09  | 0.0215653 | 1.00E-09   | 1.00E-09   | 1.00E-09  | 0.0092955 |
| <b>FMR1</b>  | <b>G3</b> | <b>Fruit</b> | <b>4</b> | 0.0194315  | 1.00E-09  | 0.0272618 | 0.044498  | 0.0224051  | 0.0133443  | 1.00E-09  | 0.0171103 |
| <b>FMR2</b>  | <b>G3</b> | <b>Fruit</b> | <b>4</b> | 1.00E-09   | 0.459163  | 1.00E-09  | 1.00E-09  | 1.00E-09   | 1.00E-09   | 0.164279  | 1.00E-09  |
| <b>FMR3</b>  | <b>G3</b> | <b>Fruit</b> | <b>4</b> | 0.119928   | 107,888   | 1.00E-09  | 0.0568318 | 1.00E-09   | 0.176006   | 0.326366  | 0.157078  |
| <b>FMR4</b>  | <b>G3</b> | <b>Fruit</b> | <b>4</b> | 1.00E-09   | 0.285957  | 1.00E-09  | 1.00E-09  | 1.00E-09   | 1.00E-09   | 1.00E-09  | 1.00E-09  |
| <b>FGR1</b>  | <b>G4</b> | <b>Fruit</b> | <b>5</b> | 0.239132   | 0.468196  | 134,708   | 486,152   | 1.00E-09   | 0.0491446  | 0.250804  | 0.297728  |
| <b>FGR2</b>  | <b>G4</b> | <b>Fruit</b> | <b>5</b> | 0.078107   | 0.191649  | 0.147811  | 0.0824784 | 0.111524   | 0.113418   | 0.121575  | 0.077845  |
| <b>FGR3</b>  | <b>G4</b> | <b>Fruit</b> | <b>5</b> | 1.00E-09   | 1.00E-09  | 1.00E-09  | 1.00E-09  | 1.00E-09   | 1.00E-09   | 0.178863  | 1.00E-09  |
| <b>FGR4</b>  | <b>G4</b> | <b>Fruit</b> | <b>5</b> | 0.0698062  | 0.0812369 | 1.00E-09  | 1.00E-09  | 1.00E-09   | 1.00E-09   | 0.123016  | 1.00E-09  |
| <b>FGR5</b>  | <b>G4</b> | <b>Fruit</b> | <b>5</b> | 1.00E-09   | 1.00E-09  | 1.00E-09  | 1.00E-09  | 1.00E-09   | 1.00E-09   | 1.00E-09  | 1.00E-09  |
| <b>FGR6</b>  | <b>G4</b> | <b>Fruit</b> | <b>5</b> | 0.0197221  | 0.243366  | 0.0483946 | 1.00E-09  | 1.00E-09   | 0.0877889  | 0.0620094 | 0.0361656 |
| <b>FGR7</b>  | <b>G4</b> | <b>Fruit</b> | <b>5</b> | 1.00E-09   | 1.00E-09  | 1.00E-09  | 1.00E-09  | 1.00E-09   | 1.00E-09   | 1.00E-09  | 1.00E-09  |
| <b>FGR8</b>  | <b>G4</b> | <b>Fruit</b> | <b>5</b> | 1.00E-09   | 1.00E-09  | 1.00E-09  | 1.00E-09  | 1.00E-09   | 1.00E-09   | 1.00E-09  | 1.00E-09  |
| <b>FGR9</b>  | <b>G4</b> | <b>Fruit</b> | <b>5</b> | 1.00E-09   | 1.00E-09  | 1.00E-09  | 1.00E-09  | 1.00E-09   | 1.00E-09   | 1.00E-09  | 1.00E-09  |
| <b>FGR10</b> | <b>G4</b> | <b>Fruit</b> | <b>5</b> | 1.00E-09   | 1.00E-09  | 0.849679  | 594,197   | 1.00E-09   | 0.276433   | 0.0451809 | 1.00E-09  |
| <b>FGR11</b> | <b>G4</b> | <b>Fruit</b> | <b>5</b> | 0.0875608  | 0.567646  | 1.00E-09  | 1.00E-09  | 0.0698364  | 0.00618734 | 0.117991  | 0.0811624 |
| <b>FGR12</b> | <b>G4</b> | <b>Fruit</b> | <b>5</b> | 0.0613761  | 0.144691  | 0.0335601 | 0.0266928 | 0.00965348 | 0.0293096  | 0.0217115 | 1.00E-09  |

|             |           |        | Retention index | RI <sup>2155</sup> | RI <sup>2183</sup> | RI <sup>2197</sup>  | 2210      | RI <sup>2214</sup> | RI <sup>2222</sup> | RI <sup>2230</sup>   | RI <sup>2248</sup>       |
|-------------|-----------|--------|-----------------|--------------------|--------------------|---------------------|-----------|--------------------|--------------------|----------------------|--------------------------|
| Sample code | Phenology | Organ  | Maturity        | oroselone          | octadecanoic acid  | ethyl octadecanoate | unknown   | retene             | sclareol           | (Z)-methyl communate | isoeugenyl phenylacetate |
| EFR1        | G0        | Flower | 1               | 0.0287526          | 1.00E-09           | 0.0750434           | 0.0652829 | 0.140549           | 0.0543288          | 140,602              | 0.11152                  |
| EFR2        | G0        | Flower | 1               | 0.0523558          | 1.00E-09           | 0.0464656           | 0.0697256 | 0.0757391          | 0.126709           | 121,937              | 0.122979                 |
| EFR3        | G0        | Flower | 1               | 48,704             | 0.0309315          | 0.0222178           | 0.097749  | 0.108519           | 0.0248488          | 0.777443             | 0.138461                 |
| EFR4        | G0        | Flower | 1               | 0.0183596          | 0.0512473          | 1.00E-09            | 0.0944571 | 0.133443           | 0.0374081          | 119,953              | 0.109505                 |
| EFR5        | G0        | Flower | 1               | 1.00E-09           | 1.00E-09           | 1.00E-09            | 1.00E-09  | 1.00E-09           | 0.0436959          | 1.00E-09             | 0.142846                 |
| EFR6        | G0        | Flower | 1               | 1.00E-09           | 0.0247237          | 1.00E-09            | 0.013765  | 0.00565683         | 0.00856289         | 0.174097             | 0.0279902                |
| EFR7        | G0        | Flower | 1               | 1.00E-09           | 1.00E-09           | 1.00E-09            | 0.0319647 | 0.0781659          | 1.00E-09           | 0.697696             | 0.0955846                |
| EFR8        | G0        | Flower | 1               | 0.721309           | 1.00E-09           | 0.0524668           | 1.00E-09  | 0.172911           | 0.058476           | 0.205167             | 0.149995                 |
| EFR9        | G0        | Flower | 1               | 1.00E-09           | 0.0576259          | 0.0787622           | 0.0802024 | 0.00566209         | 1.00E-09           | 0.115516             | 0.13995                  |
| EFR10       | G0        | Flower | 1               | 1.00E-09           | 1.00E-09           | 0.0390268           | 0.0738772 | 1.00E-09           | 0.0361951          | 0.103618             | 0.133367                 |
| FCPR1       | G1        | Fruit  | 2               | 1.00E-09           | 1.00E-09           | 0.110176            | 0.150521  | 0.16141            | 0.127223           | 0.493591             | 0.301421                 |
| FCPR2       | G1        | Fruit  | 2               | 1.00E-09           | 1.00E-09           | 1.00E-09            | 1.00E-09  | 1.00E-09           | 1.00E-09           | 0.771428             | 1.00E-09                 |
| FCPR3       | G1        | Fruit  | 2               | 1.00E-09           | 1.00E-09           | 1.00E-09            | 0.0303403 | 0.0493527          | 1.00E-09           | 0.471721             | 1.00E-09                 |
| FCPR4       | G1        | Fruit  | 2               | 1.00E-09           | 1.00E-09           | 1.00E-09            | 1.00E-09  | 1.00E-09           | 1.00E-09           | 0.546517             | 1.00E-09                 |
| FCHR1       | G2        | Fruit  | 3               | 1.00E-09           | 0.0280694          | 0.095473            | 0.0856913 | 0.110049           | 0.0673459          | 0.840769             | 0.166523                 |
| FCHR2       | G2        | Fruit  | 3               | 1.00E-09           | 1.00E-09           | 0.0592979           | 0.0532388 | 0.0910579          | 1.00E-09           | 0.106609             | 0.0876384                |
| FCHR3       | G2        | Fruit  | 3               | 1.00E-09           | 0.0453562          | 1.00E-09            | 0.0413496 | 0.0786764          | 1.00E-09           | 0.930302             | 0.114795                 |

|              |           |              |          |          |            |           |            |           |            |           |           |
|--------------|-----------|--------------|----------|----------|------------|-----------|------------|-----------|------------|-----------|-----------|
| <b>FCHR4</b> | <b>G2</b> | <b>Fruit</b> | <b>3</b> | 1.00E-09 | 1.00E-09   | 0.0192125 | 0.00843281 | 0.0214418 | 0.00265082 | 0.378732  | 0.0261003 |
| <b>FMR1</b>  | <b>G3</b> | <b>Fruit</b> | <b>4</b> | 1.00E-09 | 0.0241483  | 1.00E-09  | 0.0553813  | 1.00E-09  | 0.0338477  | 0.0180658 | 0.108148  |
| <b>FMR2</b>  | <b>G3</b> | <b>Fruit</b> | <b>4</b> | 1.00E-09 | 1.00E-09   | 1.00E-09  | 1.00E-09   | 0.151434  | 1.00E-09   | 0.152295  | 1.00E-09  |
| <b>FMR3</b>  | <b>G3</b> | <b>Fruit</b> | <b>4</b> | 1.00E-09 | 0.00429341 | 0.0926869 | 0.0545199  | 0.080674  | 0.044572   | 0.524439  | 0.118841  |
| <b>FMR4</b>  | <b>G3</b> | <b>Fruit</b> | <b>4</b> | 1.00E-09 | 1.00E-09   | 1.00E-09  | 1.00E-09   | 1.00E-09  | 1.00E-09   | 175,269   | 1.00E-09  |
| <b>FGR1</b>  | <b>G4</b> | <b>Fruit</b> | <b>5</b> | 1.00E-09 | 1.00E-09   | 0.7005    | 0.240918   | 241,719   | 0.989345   | 1.00E-09  | 0.209204  |
| <b>FGR2</b>  | <b>G4</b> | <b>Fruit</b> | <b>5</b> | 1.00E-09 | 0.0379755  | 0.135249  | 0.0250778  | 0.0561599 | 0.136859   | 0.339339  | 0.224308  |
| <b>FGR3</b>  | <b>G4</b> | <b>Fruit</b> | <b>5</b> | 1.00E-09 | 1.00E-09   | 1.00E-09  | 1.00E-09   | 0.121953  | 1.00E-09   | 0.916126  | 0.212477  |
| <b>FGR4</b>  | <b>G4</b> | <b>Fruit</b> | <b>5</b> | 1.00E-09 | 1.00E-09   | 1.00E-09  | 0.0526891  | 0.0514991 | 0.089567   | 0.115658  | 1.00E-09  |
| <b>FGR5</b>  | <b>G4</b> | <b>Fruit</b> | <b>5</b> | 1.00E-09 | 1.00E-09   | 1.00E-09  | 1.00E-09   | 1.00E-09  | 1.00E-09   | 1.00E-09  | 1.00E-09  |
| <b>FGR6</b>  | <b>G4</b> | <b>Fruit</b> | <b>5</b> | 1.00E-09 | 1.00E-09   | 1.00E-09  | 0.0867531  | 0.0612093 | 0.108925   | 0.0797886 | 0.205864  |
| <b>FGR7</b>  | <b>G4</b> | <b>Fruit</b> | <b>5</b> | 1.00E-09 | 1.00E-09   | 1.00E-09  | 1.00E-09   | 1.00E-09  | 1.00E-09   | 1.00E-09  | 1.00E-09  |
| <b>FGR8</b>  | <b>G4</b> | <b>Fruit</b> | <b>5</b> | 1.00E-09 | 1.00E-09   | 1.00E-09  | 1.00E-09   | 1.00E-09  | 1.00E-09   | 1.00E-09  | 1.00E-09  |
| <b>FGR9</b>  | <b>G4</b> | <b>Fruit</b> | <b>5</b> | 1.00E-09 | 1.00E-09   | 1.00E-09  | 1.00E-09   | 1.00E-09  | 1.00E-09   | 1.00E-09  | 1.00E-09  |
| <b>FGR10</b> | <b>G4</b> | <b>Fruit</b> | <b>5</b> | 578,226  | 0.138891   | 0.516296  | 1.00E-09   | 543,463   | 105,478    | 1.00E-09  | 0.814461  |
| <b>FGR11</b> | <b>G4</b> | <b>Fruit</b> | <b>5</b> | 1.00E-09 | 0.0548753  | 1.00E-09  | 1.00E-09   | 0.0769041 | 1.00E-09   | 0.204875  | 0.114055  |
| <b>FGR12</b> | <b>G4</b> | <b>Fruit</b> | <b>5</b> | 1.00E-09 | 1.00E-09   | 1.00E-09  | 0.0745362  | 0.0579202 | 1.00E-09   | 0.141619  | 0.0796862 |

|             |           |        | Retention index | RI <sup>2257</sup>            | RI <sup>2274</sup> | RI <sup>2288</sup> | RI <sup>2299</sup>     | RI <sup>2300</sup> | RI <sup>2371</sup>         | RI <sup>2402</sup> | RI <sup>2450</sup> |
|-------------|-----------|--------|-----------------|-------------------------------|--------------------|--------------------|------------------------|--------------------|----------------------------|--------------------|--------------------|
| Sample code | Phenology | Organ  | Maturity        | ( <i>E</i> )-methyl communate | abietal            | 11-tricosene       | 4- <i>epi</i> -abietal | tricosane          | 3 $\alpha$ -acetoxy manool | tetracosane        | ferruginol         |
| EFR1        | G0        | Flower | 1               | 1.00E-09                      | 1.00E-09           | 0.103404           | 0.0645849              | 1.00E-09           | 161,306                    | 0.0857497          | 0.088261           |
| EFR2        | G0        | Flower | 1               | 0.0022742                     | 0.0164127          | 0.0778554          | 0.0252135              | 1.00E-09           | 188,373                    | 0.148834           | 0.0486461          |
| EFR3        | G0        | Flower | 1               | 1.00E-09                      | 1.00E-09           | 0.0570985          | 511,324                | 0.0817678          | 133,716                    | 0.180045           | 0.0534365          |
| EFR4        | G0        | Flower | 1               | 0.0515979                     | 1.00E-09           | 1.00E-09           | 0.0842197              | 1.00E-09           | 0.86188                    | 0.135975           | 0.0225537          |
| EFR5        | G0        | Flower | 1               | 1.00E-09                      | 1.00E-09           | 0.0446775          | 1.00E-09               | 1.00E-09           | 1,031                      | 0.819092           | 1.00E-09           |
| EFR6        | G0        | Flower | 1               | 1.00E-09                      | 0.0019688          | 0.0346065          | 1.00E-09               | 1.00E-09           | 111,005                    | 0.0391597          | 1.00E-09           |
| EFR7        | G0        | Flower | 1               | 0.0193193                     | 1.00E-09           | 0.0443403          | 1.00E-09               | 1.00E-09           | 0.879898                   | 0.32959            | 0.0326868          |
| EFR8        | G0        | Flower | 1               | 0.041611                      | 1.00E-09           | 0.0563066          | 0.829295               | 0.133263           | 440,199                    | 0.267327           | 0.0598535          |
| EFR9        | G0        | Flower | 1               | 1.00E-09                      | 1.00E-09           | 0.0737417          | 1.00E-09               | 0.0184848          | 162,579                    | 0.0918945          | 0.0317113          |
| EFR10       | G0        | Flower | 1               | 0.0079888                     | 0.0363533          | 0.0621708          | 1.00E-09               | 1.00E-09           | 153,637                    | 0.0984924          | 1.00E-09           |
| FCPR1       | G1        | Fruit  | 2               | 0.0934459                     | 1.00E-09           | 0.16577            | 1.00E-09               | 0.164042           | 0.76047                    | 0.221225           | 0.157436           |
| FCPR2       | G1        | Fruit  | 2               | 1.00E-09                      | 1.00E-09           | 1.00E-09           | 1.00E-09               | 1.00E-09           | 0.712395                   | 1.00E-09           | 1.00E-09           |
| FCPR3       | G1        | Fruit  | 2               | 1.00E-09                      | 1.00E-09           | 1.00E-09           | 1.00E-09               | 0.0306657          | 0.434781                   | 0.0617293          | 1.00E-09           |
| FCPR4       | G1        | Fruit  | 2               | 1.00E-09                      | 1.00E-09           | 1.00E-09           | 1.00E-09               | 1.00E-09           | 0.635369                   | 1.00E-09           | 1.00E-09           |
| FCHR1       | G2        | Fruit  | 3               | 0.0368522                     | 0.0340898          | 0.0628124          | 0.0214497              | 1.00E-09           | 160,779                    | 0.0662125          | 0.0734316          |
| FCHR2       | G2        | Fruit  | 3               | 1.00E-09                      | 1.00E-09           | 1.00E-09           | 1.00E-09               | 1.00E-09           | 317,118                    | 0.107045           | 0.0512796          |
| FCHR3       | G2        | Fruit  | 3               | 0.0184092                     | 0.0260779          | 0.0440279          | 0.026466               | 1.00E-09           | 140,539                    | 0.116216           | 1.00E-09           |

|              |           |              |          |            |            |           |           |           |           |           |           |
|--------------|-----------|--------------|----------|------------|------------|-----------|-----------|-----------|-----------|-----------|-----------|
| <b>FCHR4</b> | <b>G2</b> | <b>Fruit</b> | <b>3</b> | 0.00433503 | 1.00E-09   | 0.0174244 | 1.00E-09  | 0.0128992 | 436,379   | 0.0368663 | 1.00E-09  |
| <b>FMR1</b>  | <b>G3</b> | <b>Fruit</b> | <b>4</b> | 1.00E-09   | 0.0274483  | 0.0274063 | 1.00E-09  | 1.00E-09  | 194,507   | 0.0511538 | 0.0367608 |
| <b>FMR2</b>  | <b>G3</b> | <b>Fruit</b> | <b>4</b> | 1.00E-09   | 0.00866107 | 1.00E-09  | 1.00E-09  | 0.361515  | 0.0995936 | 0.637905  | 1.00E-09  |
| <b>FMR3</b>  | <b>G3</b> | <b>Fruit</b> | <b>4</b> | 1.00E-09   | 0.0140278  | 0.0652418 | 1.00E-09  | 0.0516843 | 0.507319  | 0.182111  | 1.00E-09  |
| <b>FMR4</b>  | <b>G3</b> | <b>Fruit</b> | <b>4</b> | 1.00E-09   | 1.00E-09   | 1.00E-09  | 1.00E-09  | 0.461996  | 262,151   | 145,817   | 1.00E-09  |
| <b>FGR1</b>  | <b>G4</b> | <b>Fruit</b> | <b>5</b> | 1.00E-09   | 1.00E-09   | 0.0826698 | 43,628    | 1.00E-09  | 653,689   | 1.00E-09  | 1.00E-09  |
| <b>FGR2</b>  | <b>G4</b> | <b>Fruit</b> | <b>5</b> | 0.0354332  | 0.127191   | 0.106157  | 1.00E-09  | 0.0384366 | 378,546   | 0.22607   | 0.0816432 |
| <b>FGR3</b>  | <b>G4</b> | <b>Fruit</b> | <b>5</b> | 0.132065   | 1.00E-09   | 1.00E-09  | 1.00E-09  | 1.00E-09  | 146,704   | 0.168887  | 1.00E-09  |
| <b>FGR4</b>  | <b>G4</b> | <b>Fruit</b> | <b>5</b> | 1.00E-09   | 1.00E-09   | 1.00E-09  | 1.00E-09  | 1.00E-09  | 1.00E-09  | 1.00E-09  | 1.00E-09  |
| <b>FGR5</b>  | <b>G4</b> | <b>Fruit</b> | <b>5</b> | 1.00E-09   | 1.00E-09   | 1.00E-09  | 1.00E-09  | 1.00E-09  | 209,279   | 1.00E-09  | 1.00E-09  |
| <b>FGR6</b>  | <b>G4</b> | <b>Fruit</b> | <b>5</b> | 1.00E-09   | 1.00E-09   | 0.0821815 | 1.00E-09  | 1.00E-09  | 337,153   | 0.0668381 | 1.00E-09  |
| <b>FGR7</b>  | <b>G4</b> | <b>Fruit</b> | <b>5</b> | 1.00E-09   | 1.00E-09   | 1.00E-09  | 1.00E-09  | 1.00E-09  | 0.878354  | 1.00E-09  | 1.00E-09  |
| <b>FGR8</b>  | <b>G4</b> | <b>Fruit</b> | <b>5</b> | 1.00E-09   | 1.00E-09   | 1.00E-09  | 1.00E-09  | 1.00E-09  | 116,266   | 1.00E-09  | 1.00E-09  |
| <b>FGR9</b>  | <b>G4</b> | <b>Fruit</b> | <b>5</b> | 1.00E-09   | 1.00E-09   | 1.00E-09  | 1.00E-09  | 1.00E-09  | 258,703   | 1.00E-09  | 1.00E-09  |
| <b>FGR10</b> | <b>G4</b> | <b>Fruit</b> | <b>5</b> | 1.00E-09   | 1.00E-09   | 1.00E-09  | 596,052   | 101.94    | 383,966   | 129,849   | 0.0901909 |
| <b>FGR11</b> | <b>G4</b> | <b>Fruit</b> | <b>5</b> | 0.0856926  | 0.0348741  | 1.00E-09  | 0.0490872 | 1.00E-09  | 258,116   | 0.0905245 | 1.00E-09  |
| <b>FGR12</b> | <b>G4</b> | <b>Fruit</b> | <b>5</b> | 1.00E-09   | 1.00E-09   | 0.0601522 | 1.00E-09  | 1.00E-09  | 29,709    | 0.20688   | 0.0468984 |

|             |           |        | Retention index | <sup>RI</sup> 2467  | 2485       | <sup>RI</sup> 2503    | 2536      | <sup>RI</sup> 2545  | <sup>RI</sup> 2602   | <sup>RI</sup> 2702    | 2740      |
|-------------|-----------|--------|-----------------|---------------------|------------|-----------------------|-----------|---------------------|----------------------|-----------------------|-----------|
| Sample code | Phenology | Organ  | Maturity        | <i>neo</i> -abietol | unknown    | <i>n</i> -pentacosane | unknown   | 1,13-tetradecadiene | <i>n</i> -hexacosane | <i>n</i> -heptacosane | Unknown   |
| EFR1        | G0        | Flower | 1               | 0.0784304           | 0.00182982 | 0.0421479             | 0.046551  | 0.267249            | 0.147811             | 0.103887              | 0.11824   |
| EFR2        | G0        | Flower | 1               | 0.086449            | 1.00E-09   | 0.223794              | 0.0397861 | 0.454514            | 0.387398             | 0.428471              | 0.101017  |
| EFR3        | G0        | Flower | 1               | 0.101631            | 0.0341934  | 0.172803              | 0.0666123 | 0.151632            | 0.195401             | 0.178835              | 537,087   |
| EFR4        | G0        | Flower | 1               | 0.168862            | 0.0208313  | 0.111118              | 0.0745443 | 0.378004            | 0.169183             | 0.146121              | 0.0605057 |
| EFR5        | G0        | Flower | 1               | 1.00E-09            | 0.0658684  | 0.153378              | 1.00E-09  | 0.893166            | 1.00E-09             | 0.769731              | 1.00E-09  |
| EFR6        | G0        | Flower | 1               | 0.0876753           | 1.00E-09   | 0.0484324             | 1.00E-09  | 0.175373            | 0.0629461            | 0.0302585             | 0.0456928 |
| EFR7        | G0        | Flower | 1               | 1.00E-09            | 1.00E-09   | 0.0865023             | 1.00E-09  | 0.124982            | 0.136409             | 0.124403              | 0.0522283 |
| EFR8        | G0        | Flower | 1               | 0.174215            | 1.00E-09   | 0.199725              | 1.00E-09  | 0.373849            | 0.221991             | 0.187446              | 101,389   |
| EFR9        | G0        | Flower | 1               | 0.157924            | 1.00E-09   | 1.00E-09              | 1.00E-09  | 249,922             | 0.0923835            | 0.0812478             | 0.0928277 |
| EFR10       | G0        | Flower | 1               | 0.201707            | 1.00E-09   | 1.00E-09              | 1.00E-09  | 0.318993            | 0.128312             | 0.00654138            | 0.133738  |
| FCPR1       | G1        | Fruit  | 2               | 0.200134            | 0.0526304  | 0.193567              | 1.00E-09  | 1.00E-09            | 0.368706             | 0.325729              | 0.0874189 |
| FCPR2       | G1        | Fruit  | 2               | 1.00E-09            | 1.00E-09   | 1.00E-09              | 1.00E-09  | 0.231569            | 1.00E-09             | 1.00E-09              | 1.00E-09  |
| FCPR3       | G1        | Fruit  | 2               | 0.0942122           | 1.00E-09   | 0.106634              | 1.00E-09  | 0.466622            | 0.0556269            | 0.107095              | 1.00E-09  |
| FCPR4       | G1        | Fruit  | 2               | 0.372748            | 1.00E-09   | 1.00E-09              | 1.00E-09  | 1.00E-09            | 1.00E-09             | 1.00E-09              | 1.00E-09  |
| FCHR1       | G2        | Fruit  | 3               | 0.0329564           | 1.00E-09   | 0.034743              | 0.11559   | 1.00E-09            | 0.0856414            | 0.0341551             | 0.152442  |
| FCHR2       | G2        | Fruit  | 3               | 0.195926            | 1.00E-09   | 0.0965727             | 1.00E-09  | 1.00E-09            | 0.166234             | 0.2072                | 1.00E-09  |
| FCHR3       | G2        | Fruit  | 3               | 0.0637544           | 1.00E-09   | 0.0894005             | 1.00E-09  | 0.512626            | 0.215811             | 0.180091              | 0.0717401 |

|              |           |              |          |           |          |           |           |           |           |           |           |
|--------------|-----------|--------------|----------|-----------|----------|-----------|-----------|-----------|-----------|-----------|-----------|
| <b>FCHR4</b> | <b>G2</b> | <b>Fruit</b> | <b>3</b> | 0.0323568 | 1.00E-09 | 0.0442855 | 1.00E-09  | 0.0600727 | 0.0759051 | 0.0896748 | 0.023424  |
| <b>FMR1</b>  | <b>G3</b> | <b>Fruit</b> | <b>4</b> | 0.203114  | 1.00E-09 | 0.067015  | 1.00E-09  | 1.00E-09  | 0.135913  | 0.0927247 | 0.168815  |
| <b>FMR2</b>  | <b>G3</b> | <b>Fruit</b> | <b>4</b> | 0.123321  | 1.00E-09 | 0.716372  | 1.00E-09  | 0.313159  | 110,571   | 211,492   | 0.0103026 |
| <b>FMR3</b>  | <b>G3</b> | <b>Fruit</b> | <b>4</b> | 1.00E-09  | 1.00E-09 | 0.197357  | 1.00E-09  | 0.591322  | 0.160394  | 0.25184   | 0.0778251 |
| <b>FMR4</b>  | <b>G3</b> | <b>Fruit</b> | <b>4</b> | 0.92192   | 1.00E-09 | 267,259   | 1.00E-09  | 0.53576   | 421,661   | 541,309   | 241,968   |
| <b>FGR1</b>  | <b>G4</b> | <b>Fruit</b> | <b>5</b> | 1.00E-09  | 1.00E-09 | 1.00E-09  | 1.00E-09  | 1.00E-09  | 1.00E-09  | 1.00E-09  | 1.00E-09  |
| <b>FGR2</b>  | <b>G4</b> | <b>Fruit</b> | <b>5</b> | 0.161904  | 1.00E-09 | 0.133859  | 1.00E-09  | 0.713671  | 0.217274  | 0.248259  | 0.222482  |
| <b>FGR3</b>  | <b>G4</b> | <b>Fruit</b> | <b>5</b> | 0.14539   | 1.00E-09 | 0.213669  | 1.00E-09  | 0.40396   | 0.330826  | 0.317311  | 0.164324  |
| <b>FGR4</b>  | <b>G4</b> | <b>Fruit</b> | <b>5</b> | 0.198232  | 1.00E-09 | 1.00E-09  | 1.00E-09  | 1.00E-09  | 0.0622158 | 1.00E-09  | 0.076406  |
| <b>FGR5</b>  | <b>G4</b> | <b>Fruit</b> | <b>5</b> | 1.00E-09  | 1.00E-09 | 1.00E-09  | 1.00E-09  | 1.00E-09  | 1.00E-09  | 1.00E-09  | 1.00E-09  |
| <b>FGR6</b>  | <b>G4</b> | <b>Fruit</b> | <b>5</b> | 0.169027  | 1.00E-09 | 1.00E-09  | 0.0239866 | 1.00E-09  | 0.0704668 | 0.0859459 | 0.101775  |
| <b>FGR7</b>  | <b>G4</b> | <b>Fruit</b> | <b>5</b> | 1.00E-09  | 1.00E-09 | 1.00E-09  | 1.00E-09  | 0.269105  | 1.00E-09  | 0.201412  | 1.00E-09  |
| <b>FGR8</b>  | <b>G4</b> | <b>Fruit</b> | <b>5</b> | 0.344446  | 1.00E-09 | 1.00E-09  | 1.00E-09  | 0.319363  | 1.00E-09  | 1.00E-09  | 1.00E-09  |
| <b>FGR9</b>  | <b>G4</b> | <b>Fruit</b> | <b>5</b> | 1.00E-09  | 1.00E-09 | 1.00E-09  | 1.00E-09  | 0.454497  | 1.00E-09  | 1.00E-09  | 1.00E-09  |
| <b>FGR10</b> | <b>G4</b> | <b>Fruit</b> | <b>5</b> | 182,032   | 1.00E-09 | 989,506   | 1.00E-09  | 0.457198  | 0.131537  | 0.0772464 | 0.0663651 |
| <b>FGR11</b> | <b>G4</b> | <b>Fruit</b> | <b>5</b> | 1.00E-09  | 1.00E-09 | 1.00E-09  | 1.00E-09  | 0.457197  | 1.00E-09  | 1.00E-09  | 1.00E-09  |
| <b>FGR12</b> | <b>G4</b> | <b>Fruit</b> | <b>5</b> | 0.0919879 | 1.00E-09 | 0.0836399 | 1.00E-09  | 0.492819  | 0.129502  | 1.00E-09  | 0.0256568 |



|             |           |        |          | Retention index | 2761      | 2785                 | <sup>RI</sup> 2803 | 2827      | 2850 |
|-------------|-----------|--------|----------|-----------------|-----------|----------------------|--------------------|-----------|------|
| Sample code | Phenology | Organ  | Maturity | unknown         | Unknown   | <i>n</i> -octacosane | unknown            | unknown   |      |
| EFR1        | G0        | Flower | 1        | 0.178327        | 0.269137  | 0.0680628            | 0.233515           | 0.105741  |      |
| EFR2        | G0        | Flower | 1        | 0.0618177       | 0.284388  | 0.416104             | 0.232782           | 1.00E-09  |      |
| EFR3        | G0        | Flower | 1        | 1.00E-09        | 0.22007   | 0.154888             | 0.185958           | 476,646   |      |
| EFR4        | G0        | Flower | 1        | 0.0265604       | 0.864726  | 0.170083             | 0.195646           | 1.00E-09  |      |
| EFR5        | G0        | Flower | 1        | 424,391         | 1.00E-09  | 0.634712             | 0.351965           | 0.419842  |      |
| EFR6        | G0        | Flower | 1        | 1.00E-09        | 0.0870264 | 0.0698729            | 0.0801606          | 0.0117851 |      |
| EFR7        | G0        | Flower | 1        | 0.107028        | 0.135179  | 0.133759             | 0.127252           | 1.00E-09  |      |
| EFR8        | G0        | Flower | 1        | 1.00E-09        | 0.121355  | 0.107579             | 0.35757            | 0.930824  |      |
| EFR9        | G0        | Flower | 1        | 0.153015        | 0.418573  | 0.1116               | 258,716            | 0.100607  |      |
| EFR10       | G0        | Flower | 1        | 0.398613        | 0.373309  | 0.161763             | 0.349968           | 1.00E-09  |      |
| FCPR1       | G1        | Fruit  | 2        | 1.00E-09        | 490,122   | 0.219689             | 0.207118           | 1.00E-09  |      |
| FCPR2       | G1        | Fruit  | 2        | 0.17027         | 1.00E-09  | 1.00E-09             | 0.184258           | 1.00E-09  |      |
| FCPR3       | G1        | Fruit  | 2        | 1.00E-09        | 0.12043   | 0.0852258            | 0.228221           | 1.00E-09  |      |
| FCPR4       | G1        | Fruit  | 2        | 1.00E-09        | 1.00E-09  | 1.00E-09             | 1.00E-09           | 1.00E-09  |      |
| FCHR1       | G2        | Fruit  | 3        | 1.00E-09        | 0.145814  | 0.0734739            | 0.216979           | 0.125118  |      |
| FCHR2       | G2        | Fruit  | 3        | 1.00E-09        | 0.361093  | 0.194919             | 0.300984           | 0.0769353 |      |
| FCHR3       | G2        | Fruit  | 3        | 0.0372557       | 0.251525  | 0.215598             | 0.702414           | 0.109592  |      |

|              |           |              |          |           |          |            |           |           |
|--------------|-----------|--------------|----------|-----------|----------|------------|-----------|-----------|
| <b>FCHR4</b> | <b>G2</b> | <b>Fruit</b> | <b>3</b> | 0.0139638 | 0.060408 | 0.0928256  | 0.0990605 | 0.021981  |
| <b>FMR1</b>  | <b>G3</b> | <b>Fruit</b> | <b>4</b> | 1.00E-09  | 0.265911 | 0.168484   | 0.348382  | 0.243147  |
| <b>FMR2</b>  | <b>G3</b> | <b>Fruit</b> | <b>4</b> | 0.079528  | 1.00E-09 | 415,547    | 0.372805  | 0.3316    |
| <b>FMR3</b>  | <b>G3</b> | <b>Fruit</b> | <b>4</b> | 0.0833395 | 1.00E-09 | 0.188176   | 0.49145   | 0.130036  |
| <b>FMR4</b>  | <b>G3</b> | <b>Fruit</b> | <b>4</b> | 1.00E-09  | 0.473242 | 526,396    | 0.27375   | 273,824   |
| <b>FGR1</b>  | <b>G4</b> | <b>Fruit</b> | <b>5</b> | 0.251909  | 314,998  | 239,207    | 0.0130572 | 1.00E-09  |
| <b>FGR2</b>  | <b>G4</b> | <b>Fruit</b> | <b>5</b> | 0.10486   | 0.227294 | 0.219934   | 0.379511  | 0.22305   |
| <b>FGR3</b>  | <b>G4</b> | <b>Fruit</b> | <b>5</b> | 1.00E-09  | 0.526016 | 0.30106    | 0.2122    | 1.00E-09  |
| <b>FGR4</b>  | <b>G4</b> | <b>Fruit</b> | <b>5</b> | 1.00E-09  | 0.462328 | 0.065149   | 0.56676   | 0.0938768 |
| <b>FGR5</b>  | <b>G4</b> | <b>Fruit</b> | <b>5</b> | 1.00E-09  | 0.363251 | 1.00E-09   | 0.76706   | 1.00E-09  |
| <b>FGR6</b>  | <b>G4</b> | <b>Fruit</b> | <b>5</b> | 0.129505  | 0.265595 | 0.0617308  | 0.461481  | 1.00E-09  |
| <b>FGR7</b>  | <b>G4</b> | <b>Fruit</b> | <b>5</b> | 1.00E-09  | 0.470433 | 0.198257   | 1.00E-09  | 0.184769  |
| <b>FGR8</b>  | <b>G4</b> | <b>Fruit</b> | <b>5</b> | 1.00E-09  | 1.00E-09 | 1.00E-09   | 124,036   | 1.00E-09  |
| <b>FGR9</b>  | <b>G4</b> | <b>Fruit</b> | <b>5</b> | 1.00E-09  | 1.00E-09 | 1.00E-09   | 111,053   | 1.00E-09  |
| <b>FGR10</b> | <b>G4</b> | <b>Fruit</b> | <b>5</b> | 1.00E-09  | 1.00E-09 | 1.00E-09   | 1.00E-09  | 1.00E-09  |
| <b>FGR11</b> | <b>G4</b> | <b>Fruit</b> | <b>5</b> | 0.047228  | 1.00E-09 | 0.114444   | 0.265185  | 1.00E-09  |
| <b>FGR12</b> | <b>G4</b> | <b>Fruit</b> | <b>5</b> | 383,741   | 1.00E-09 | 0.00850689 | 0.291367  | 0.121669  |

<sup>RI</sup> Indicates that a compound was tentatively identified only by spectrum comparison with the NIST library and by retention index comparison with retention indexes reported in literature. <sup>RI/\*</sup> Indicates that a compound was well identified by spectrum comparison with the NIST library, retention index comparison with literature and retention index comparison with a synthetic standard compound. Unknown compounds are those without a match in NIST library or retention index reported in literature. A value of 1.00E-09 was assigned to compounds not detected in the corresponding sample.

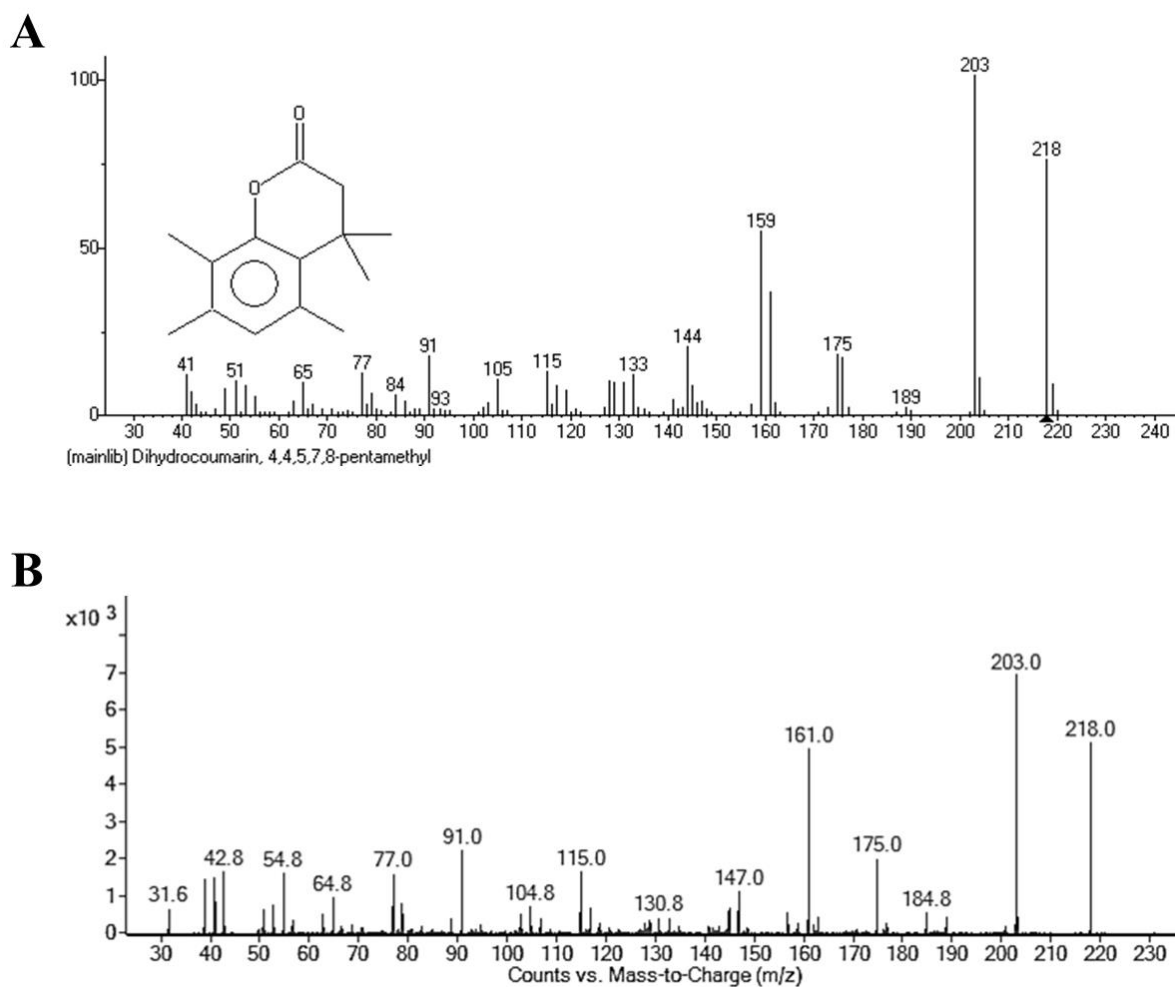

**Figure S1.** Mass spectra comparison of **(A)** 4,4,5,7,8-pentamethyldihydrocoumarin reported in the NIST library (V. 2014) and **(B)** 4,4,5,7,8-pentamethyldihydrocoumarin detected in the soursop (*Annona muricata* L.) fruits.

**A**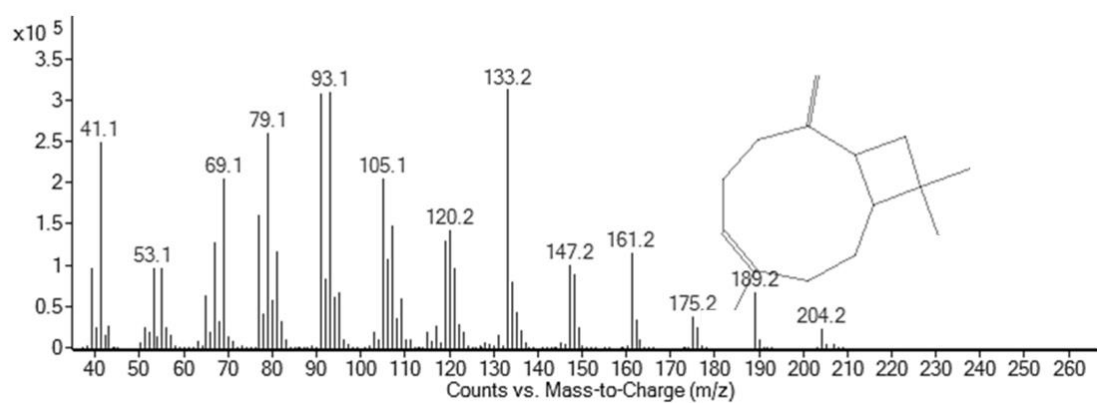**B**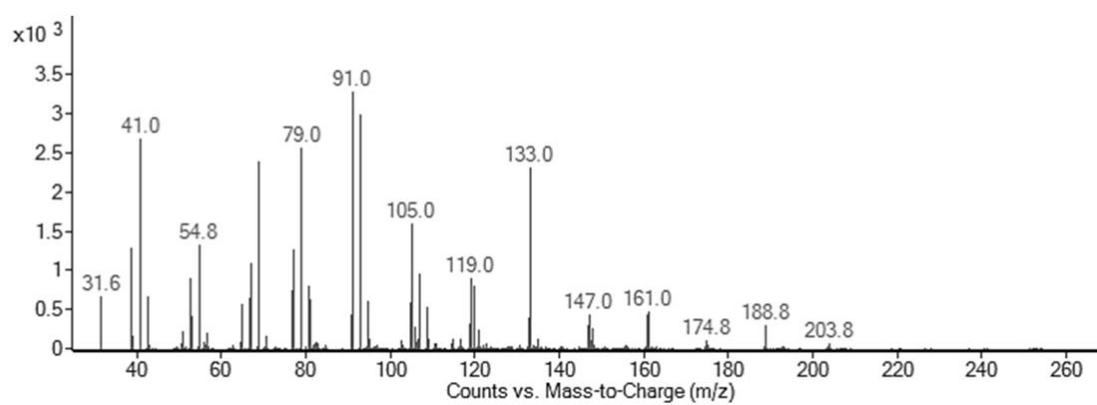

**Figure S2.** Mass spectra comparison of **(A)** a synthetic standard of (*E*)-β-caryophyllene and **(B)** (*E*)-β-caryophyllene detected in the soursop (*Annona muricata* L.) fruits.

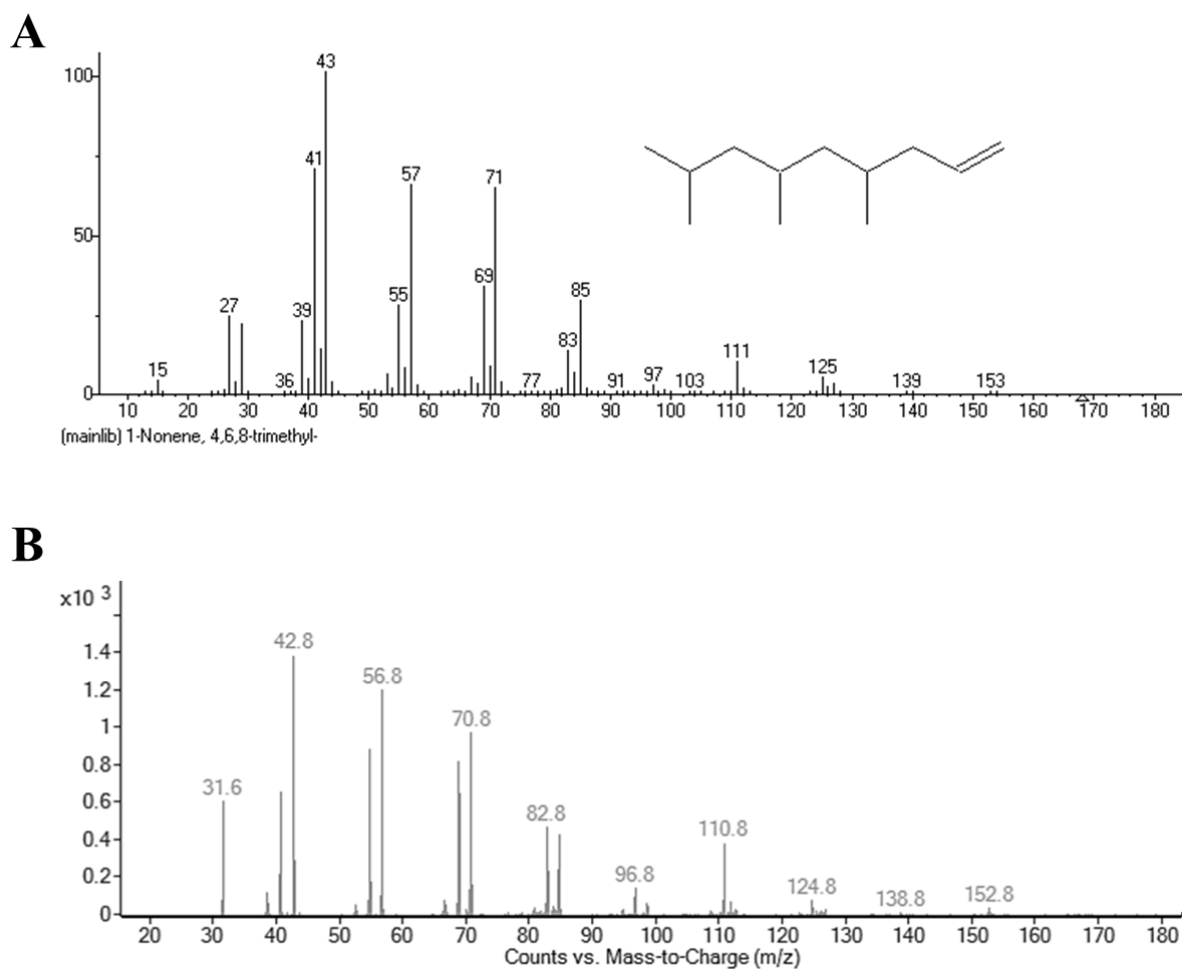

**Figure S3.** Mass spectra comparison of **(A)** 4,6,8-trimethyl-1-nonene reported in the NIST library (V. 2014) and **(B)** 4,6,8-trimethyl-1-nonene detected in the soursop (*Annona muricata* L.) fruits.

**A**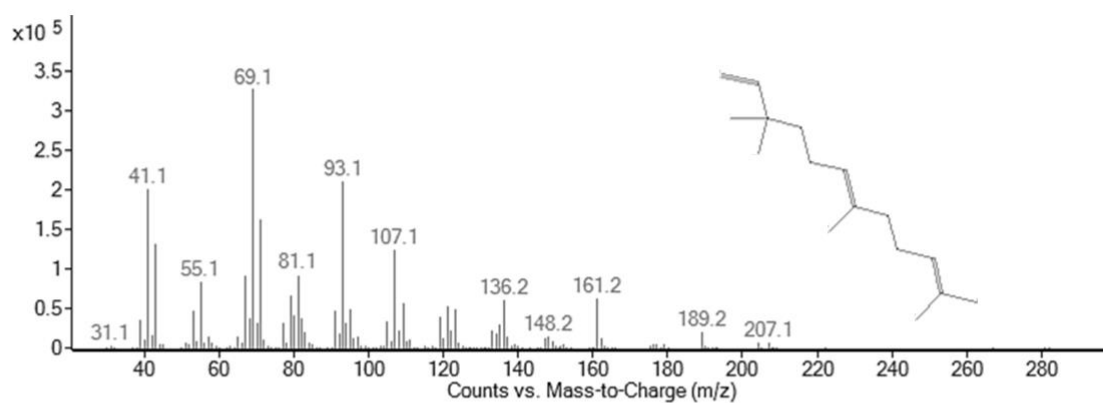**B**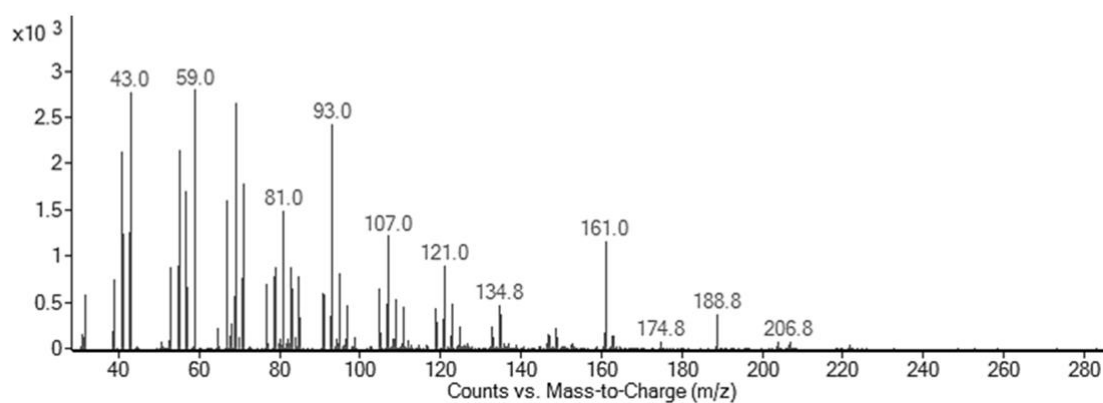

**Figure S4.** Mass spectra comparison of **(A)** a synthetic standard of nerolidol and **(B)** nerolidol detected in the soursop (*Annona muricata* L.) fruits.

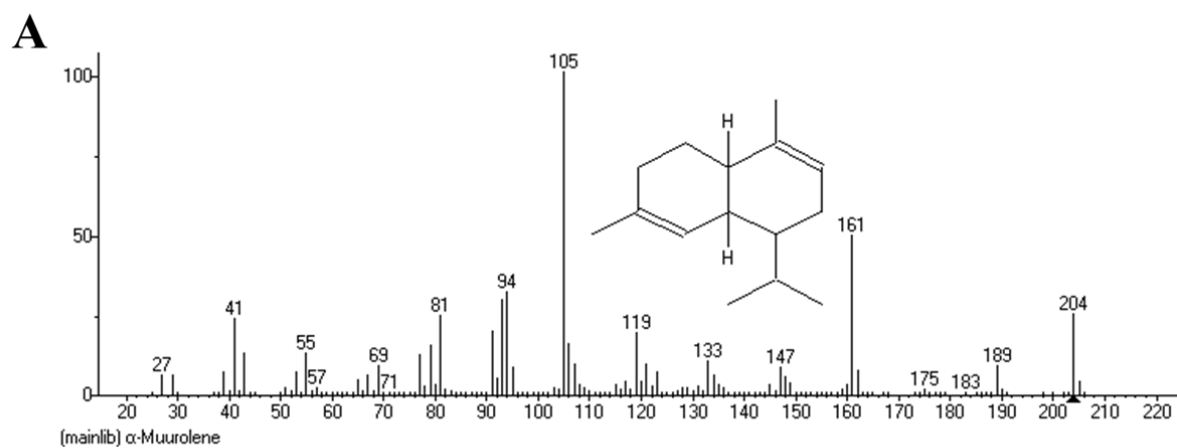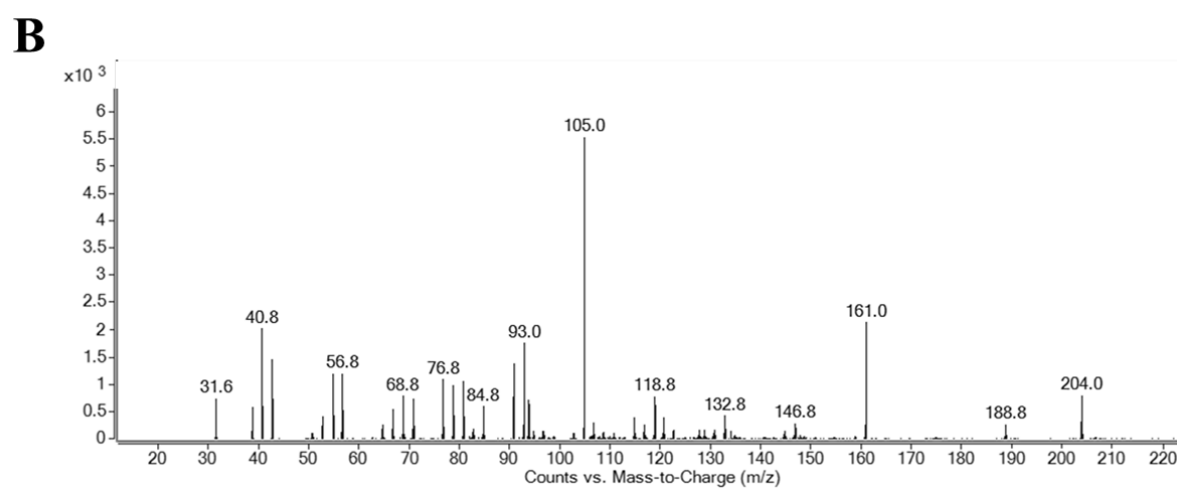

**Figure S5.** Mass spectra comparison of **(A)**  $\alpha$ -murolene reported in the NIST library (V. 2014) and **(B)**  $\alpha$ -murolene detected in the soursop (*Annona muricata* L.) fruits.

**A**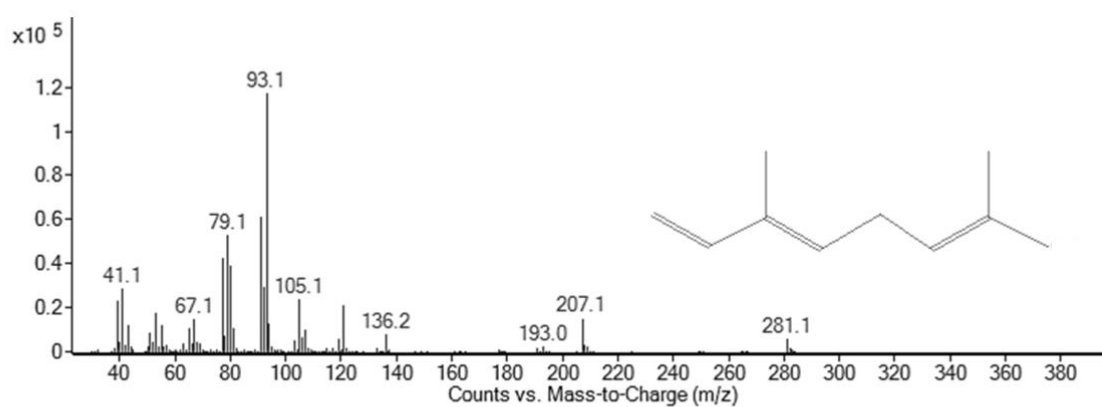**B**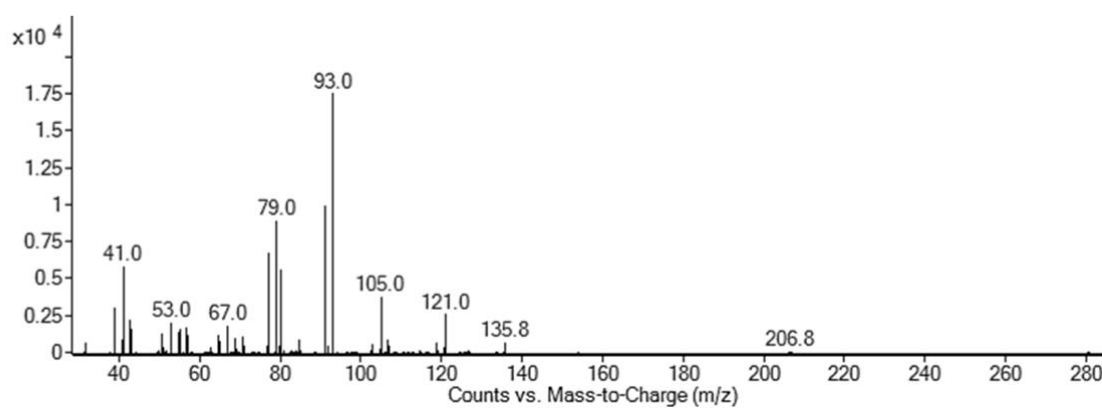

**Figure S6.** Mass spectra comparison of **(A)** a synthetic standard of  $\beta$ -ocimene and **(B)**  $\beta$ -ocimene detected in the soursop (*Annona muricata* L.) fruits.



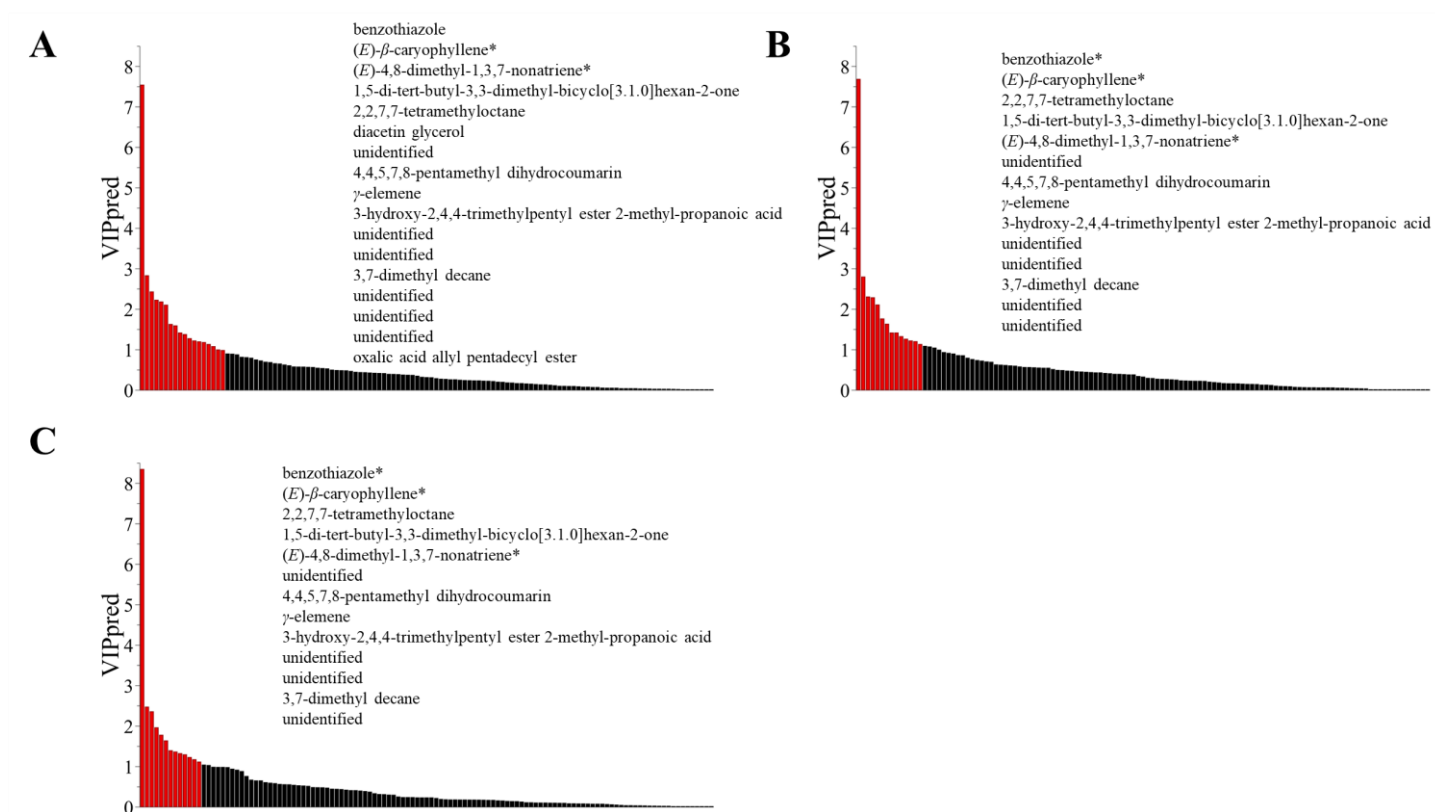

**Figure S7.** Predictive variable importance for the projection ( $VIP_{pred}$ )-plot of **(A)** volatiles correlated to the maturation of soursop (*Annona muricata* L.) fruits, **(B)** volatiles correlated with the attraction of male Annonaceae fruit weevils (*Optatus palmaris*), and **(C)** female Annonaceae fruit weevils. Red bars correspond to most correlated volatiles with the tested variable in the model. Black bars correspond to uncorrelated volatiles with the tested variable in the model. \* Indicates that the compound identity was corroborated with a standard compound.

**A**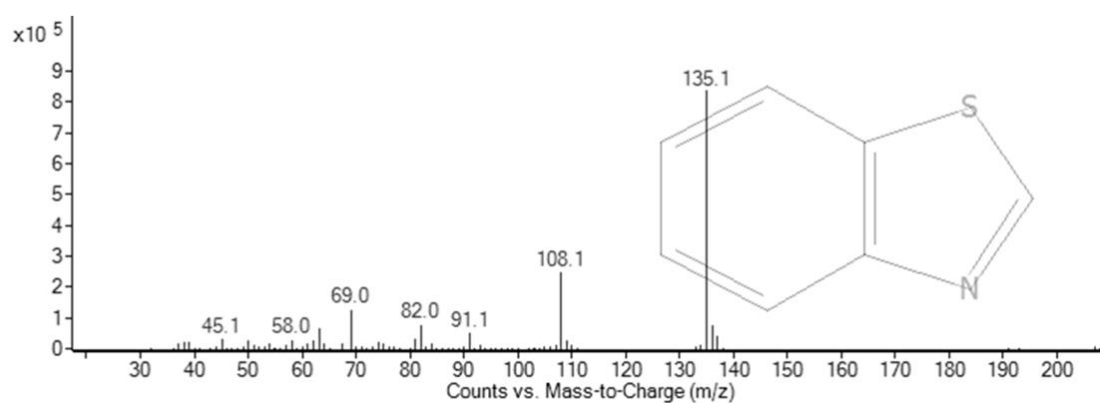**B**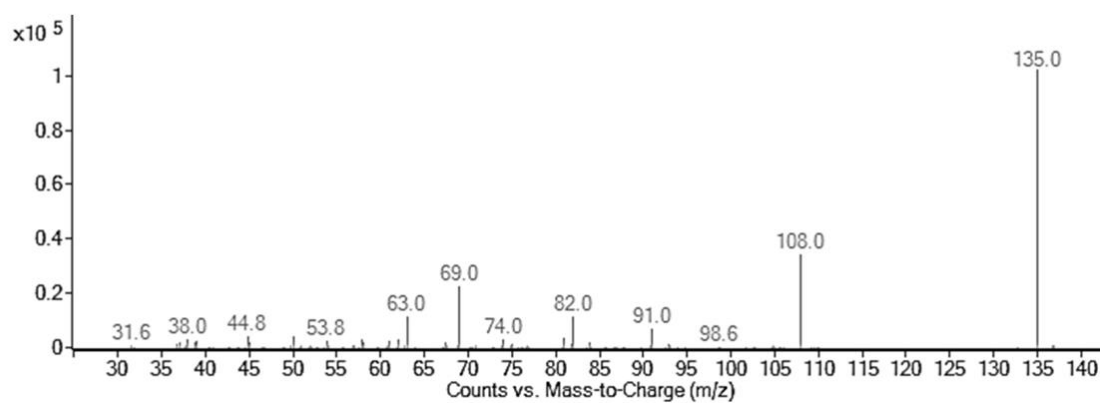

**Figure S8.** Mass spectra comparison of **(A)** a synthetic standard of benzothiazole and **(B)** benzothiazole detected in the soursop (*Annona muricata* L.) fruits.

**A**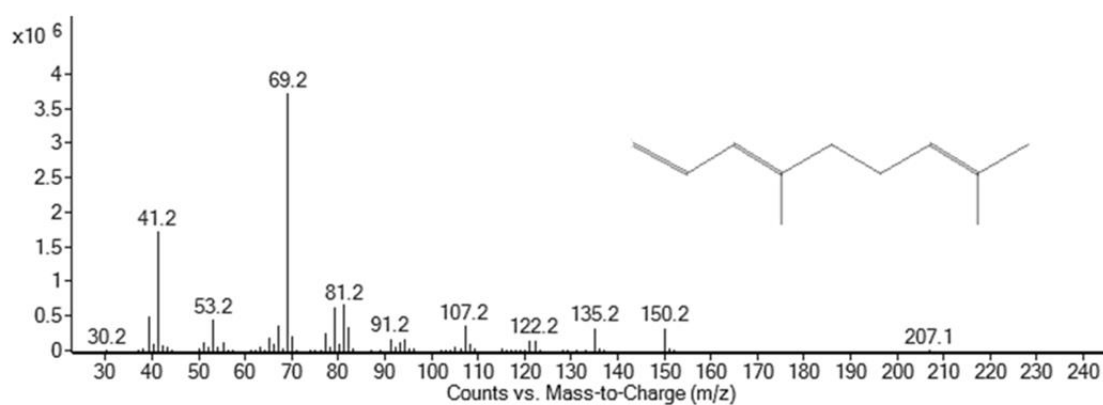**B**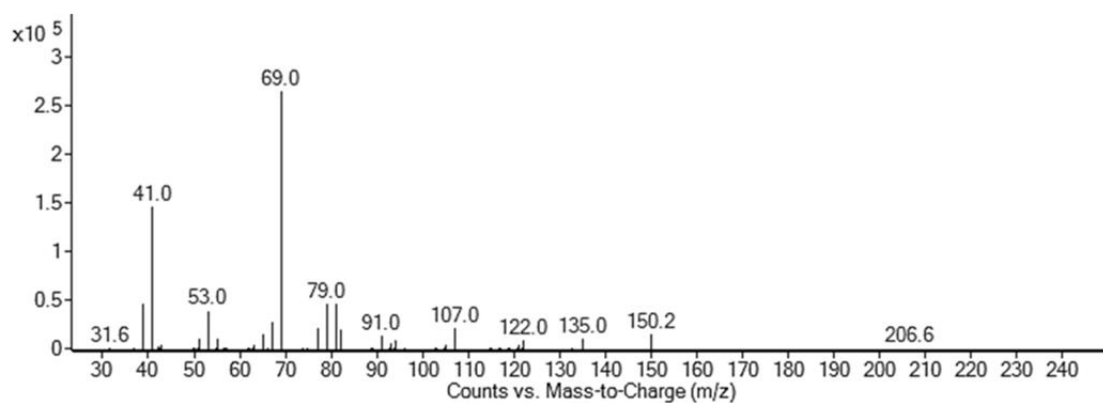

**Figure S9.** Mass spectra comparison of **(A)** a synthetic standard of (E)-4,8-dimethyl-1,3,7-nonatriene and **(B)** (E)-4,8-dimethyl-1,3,7-nonatriene detected in the soursop (*Annona muricata* L.) fruits.

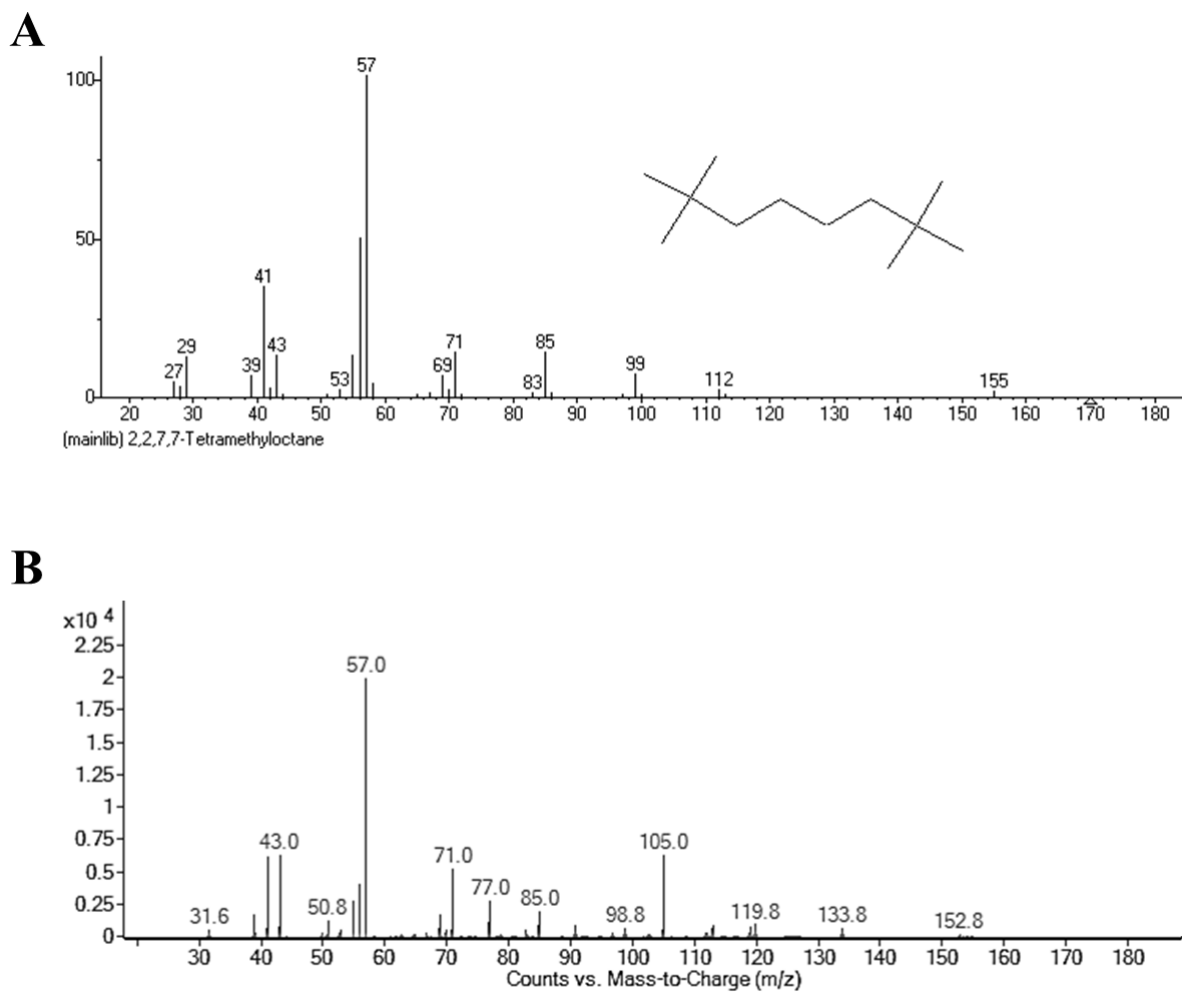

**Figure S10.** Mass spectra comparison of **(A)** 2,2,7,7-tetramethyloctane reported in the NIST library (V. 2014) and **(B)** 2,2,7,7-tetramethyloctane detected in the soursop (*Annona muricata* L.) fruits.

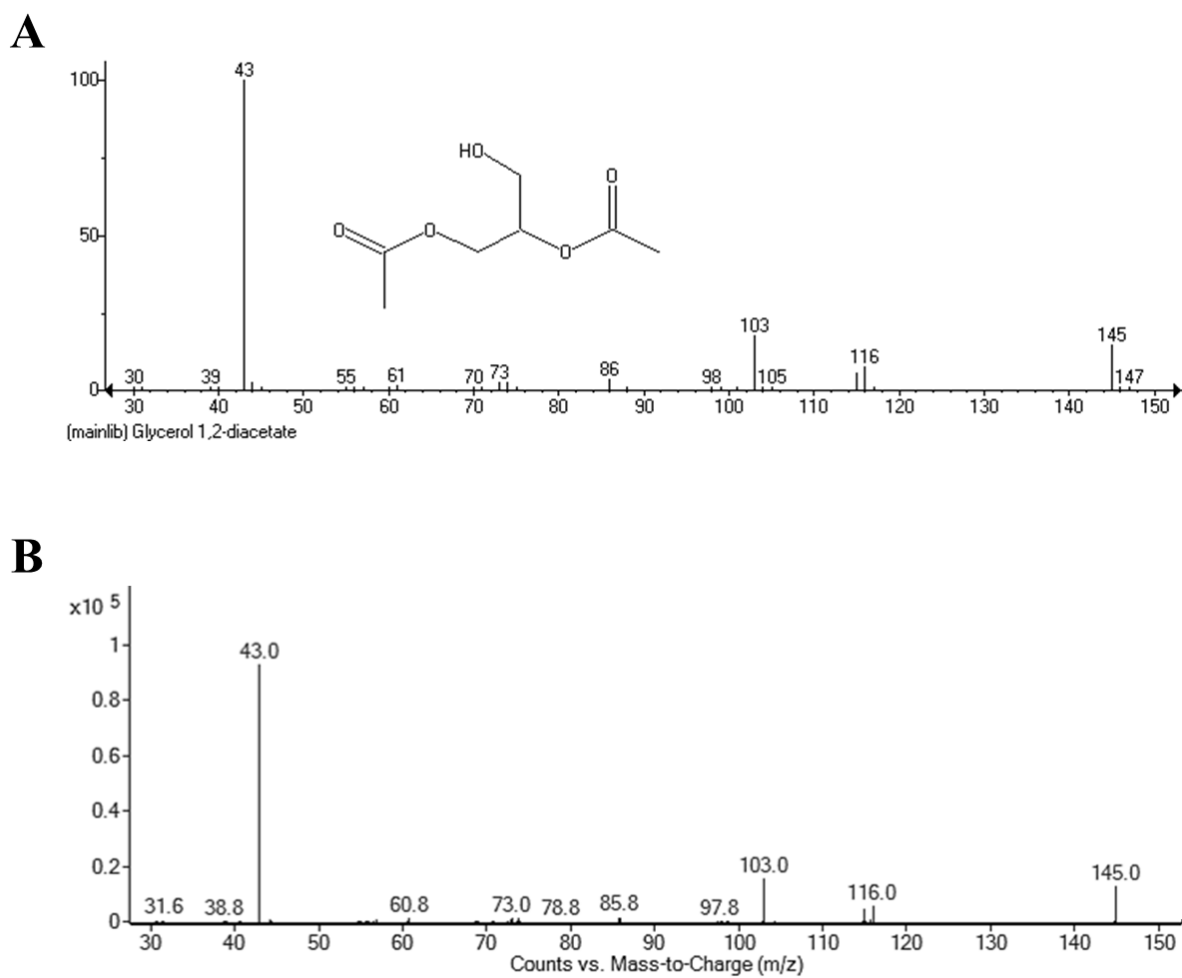

**Figure S11.** Mass spectra comparison of **(A)** diacetin glycerol reported in the NIST library (V. 2014) and **(B)** diacetin glycerol detected in the soursop (*Annona muricata* L.) fruits.

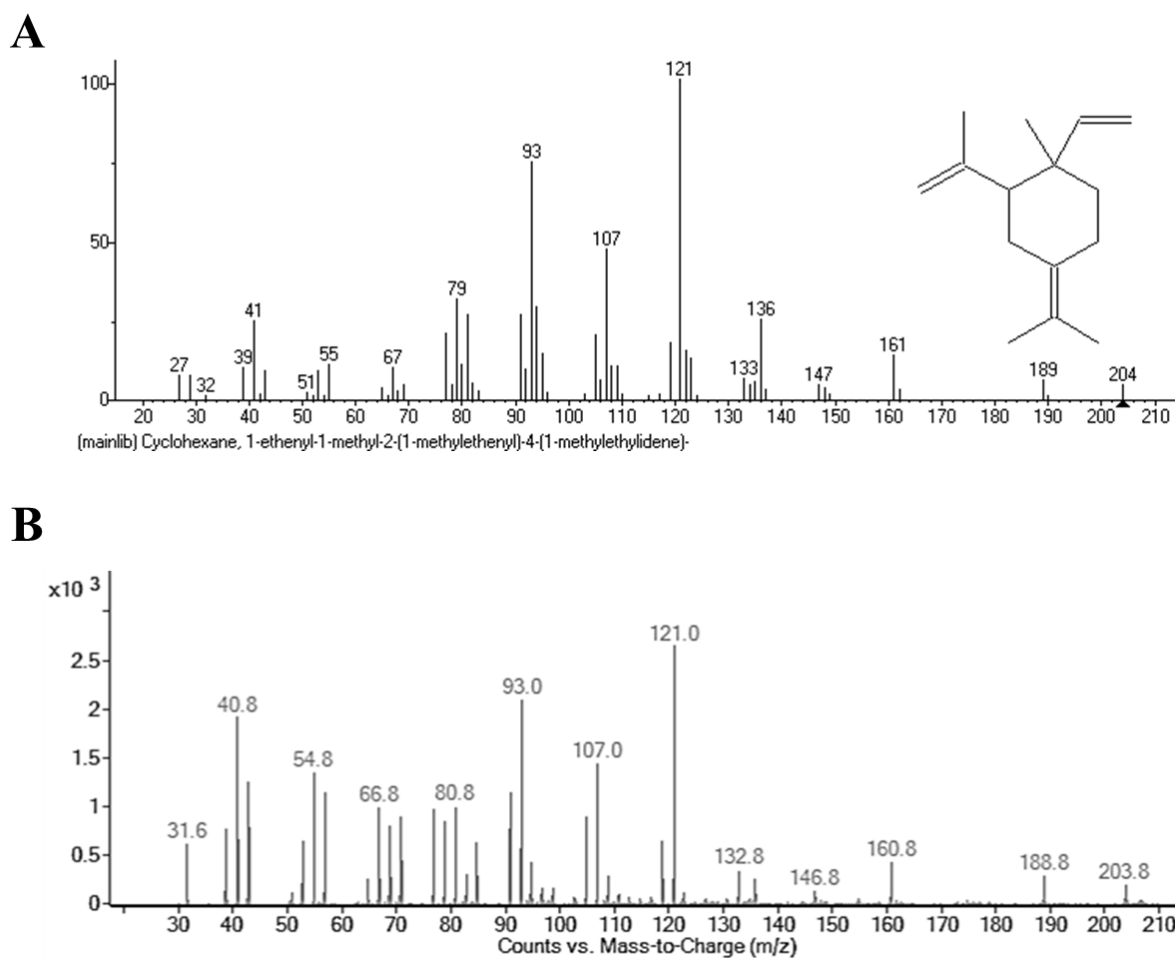

**Figure S12.** Mass spectra comparison of **(A)**  $\gamma$ -elemene reported in the NIST library (V. 2014) and **(B)**  $\gamma$ -elemene detected in the soursop (*Annona muricata* L.) fruits.

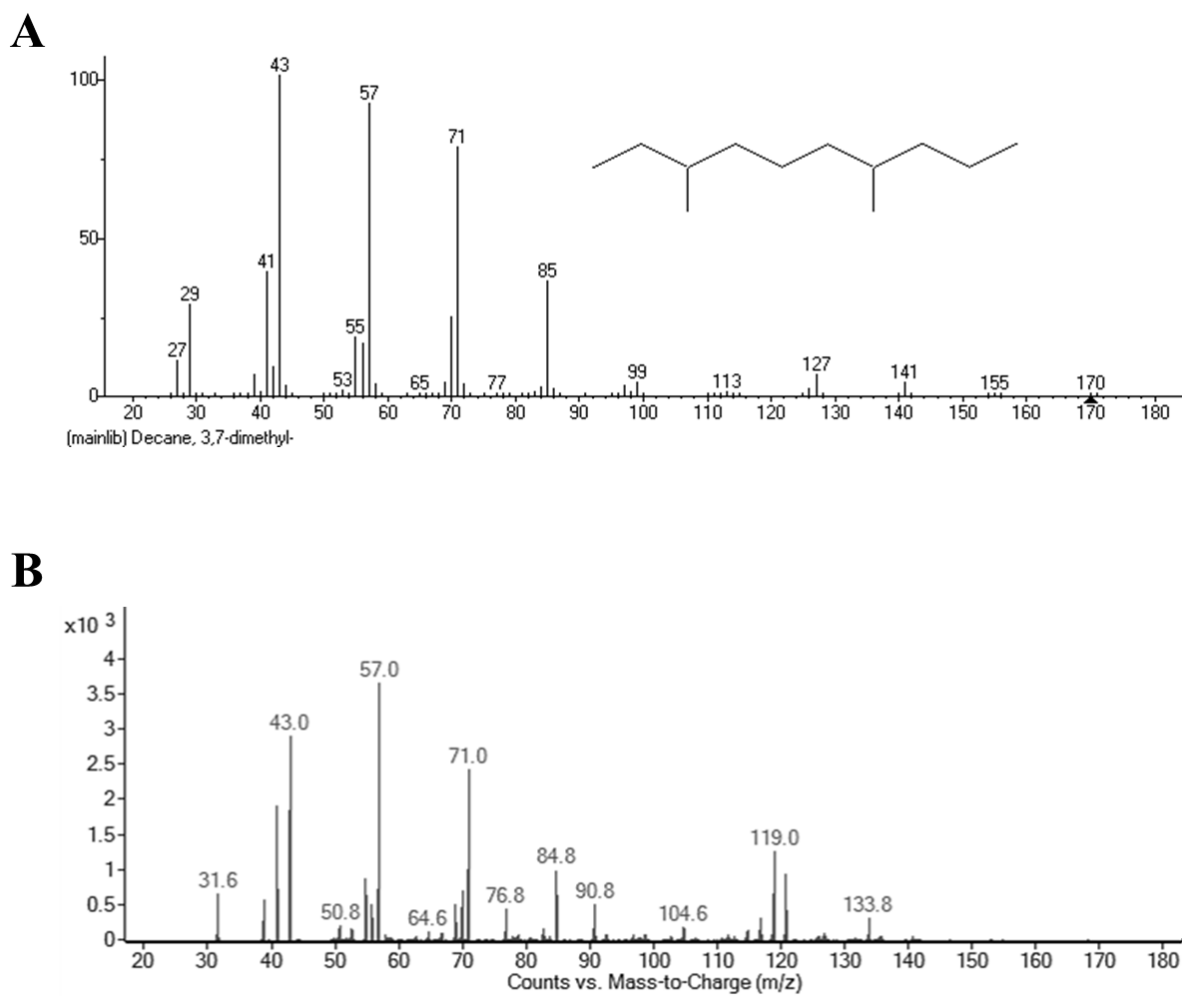

**Figure S13.** Mass spectra comparison of **(A)** 3,7-dimethyldecane reported in the NIST library (V. 2014) and **(B)** 3,7-dimethyldecane detected in the soursop (*Annona muricata* L.) fruits.

**A**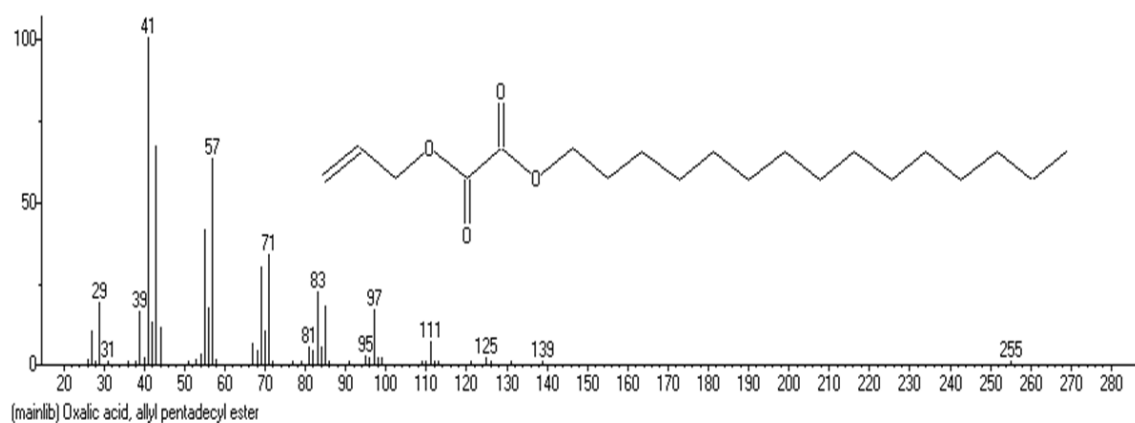**B**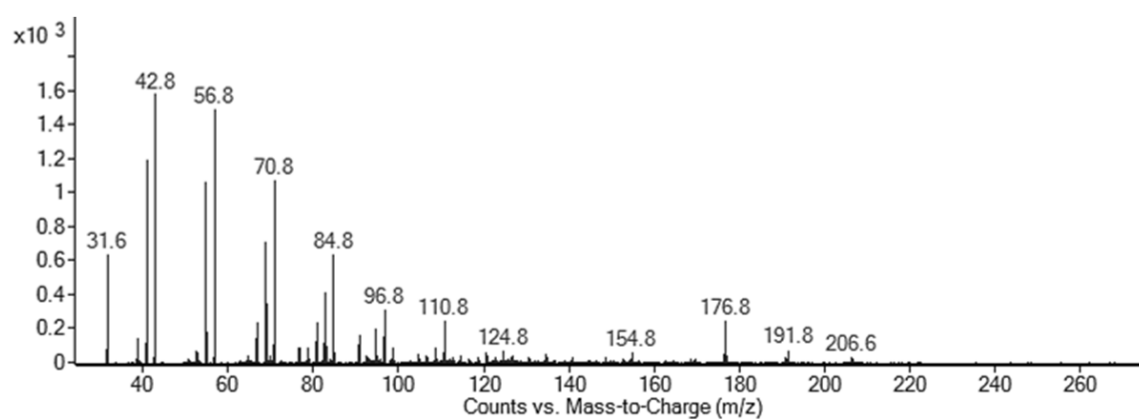

**Figure S14.** Mass spectra comparison of (A) oxalic acid allyl pentadecyl ester reported in the NIST library (V. 2014) and (B) oxalic acid allyl pentadecyl ester detected in the soursop (*Annona muricata* L.) fruits.



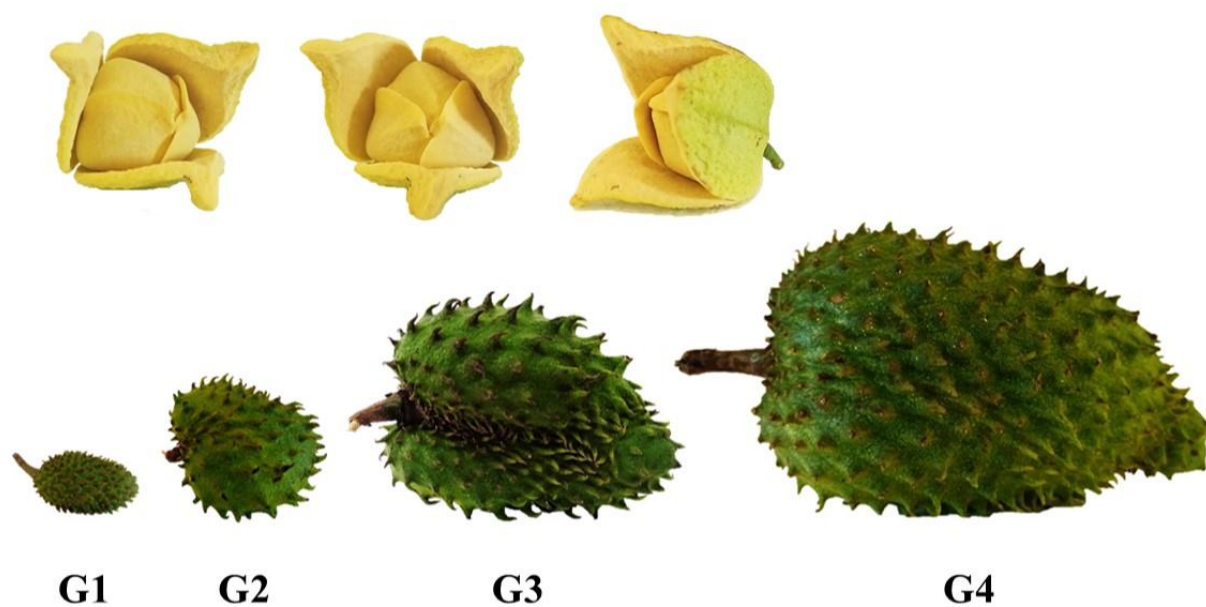

**Figure S15.** Representatives of flowers (top) and fruits (bottom) at different maturation stages of soursop (*Annona muricata* L.) used for volatile collection.
